# Supplementary material
Source: PubMed Central journal article supplement (PMC10848234)
Supplement: erad241_suppl_supplementary_tables_s1-s8.pdf [file erad241_suppl_supplementary_tables_s1-s8.pdf]

| <b>Biological Process</b>                                                              | <b>Gene #</b> | <b>Expected</b> | <b>Over/Under</b> | <b>Fold Enrichment</b> | <b>P-Value</b> |
|----------------------------------------------------------------------------------------|---------------|-----------------|-------------------|------------------------|----------------|
| response to stimulus (GO:0050896)                                                      | 474           | 280.85          | +                 | 1.69                   | 5.58E-38       |
| response to light stimulus (GO:0009416)                                                | 160           | 60.46           | +                 | 2.65                   | 1.03E-24       |
| response to radiation (GO:0009314)                                                     | 161           | 61.73           | +                 | 2.61                   | 3.37E-24       |
| response to abiotic stimulus (GO:0009628)                                              | 244           | 124.18          | +                 | 1.96                   | 8.25E-22       |
| response to organic substance (GO:0010033)                                             | 214           | 105.83          | +                 | 2.02                   | 8.63E-20       |
| response to chemical (GO:0042221)                                                      | 261           | 152.53          | +                 | 1.71                   | 1.68E-15       |
| response to endogenous stimulus (GO:0009719)                                           | 160           | 76.73           | +                 | 2.09                   | 1.15E-14       |
| response to hormone (GO:0009725)                                                       | 158           | 75.71           | +                 | 2.09                   | 2.11E-14       |
| response to external stimulus (GO:0009605)                                             | 160           | 89.56           | +                 | 1.79                   | 5.46E-09       |
| response to auxin (GO:0009733)                                                         | 43            | 11.62           | +                 | 3.7                    | 7.79E-09       |
| biological process involved in interspecies interaction between organisms (GO:0044419) | 138           | 75.07           | +                 | 1.84                   | 4.07E-08       |
| response to external biotic stimulus (GO:0043207)                                      | 137           | 74.59           | +                 | 1.84                   | 5.47E-08       |
| response to other organism (GO:0051707)                                                | 137           | 74.59           | +                 | 1.84                   | 5.47E-08       |
| response to biotic stimulus (GO:0009607)                                               | 137           | 74.65           | +                 | 1.84                   | 5.55E-08       |
| cellular nitrogen compound metabolic process (GO:0034641)                              | 41            | 97.8            | -                 | 0.42                   | 7.99E-08       |
| response to oxygen-containing compound (GO:1901700)                                    | 159           | 93.18           | +                 | 1.71                   | 1.98E-07       |
| response to stress (GO:0006950)                                                        | 238           | 159.56          | +                 | 1.49                   | 3.60E-07       |
| response to lipid (GO:0033993)                                                         | 112           | 58.41           | +                 | 1.92                   | 4.36E-07       |
| nucleobase-containing compound metabolic process (GO:0006139)                          | 23            | 68.64           | -                 | 0.34                   | 4.67E-07       |
| nucleic acid metabolic process (GO:0090304)                                            | 16            | 56.63           | -                 | 0.28                   | 5.97E-07       |
| defense response to other organism (GO:0098542)                                        | 115           | 63.87           | +                 | 1.8                    | 8.27E-06       |
| defense response (GO:0006952)                                                          | 127           | 73.68           | +                 | 1.72                   | 1.27E-05       |

|                                                           |               |                 |                   |                        |                |
|-----------------------------------------------------------|---------------|-----------------|-------------------|------------------------|----------------|
| response to red or far red light (GO:0009639)             | 35            | 11.32           | +                 | 3.09                   | 6.12E-05       |
| response to organic cyclic compound (GO:0014070)          | 56            | 24.66           | +                 | 2.27                   | 1.73E-04       |
| gene expression (GO:0010467)                              | 19            | 51.74           | -                 | 0.37                   | 6.31E-04       |
| response to bacterium (GO:0009617)                        | 73            | 37.49           | +                 | 1.95                   | 6.76E-04       |
| response to wounding (GO:0009611)                         | 54            | 24.6            | +                 | 2.19                   | 9.57E-04       |
| cellular aromatic compound metabolic process (GO:0006725) | 48            | 91.04           | -                 | 0.53                   | 1.19E-03       |
| response to light intensity (GO:0009642)                  | 32            | 11.26           | +                 | 2.84                   | 1.41E-03       |
| heterocycle metabolic process (GO:0046483)                | 46            | 87.03           | -                 | 0.53                   | 2.39E-03       |
| RNA metabolic process (GO:0016070)                        | 14            | 41.93           | -                 | 0.33                   | 2.61E-03       |
| secondary metabolic process (GO:0019748)                  | 52            | 24.45           | +                 | 2.13                   | 3.02E-03       |
| cell wall organization or biogenesis (GO:0071554)         | 59            | 29.19           | +                 | 2.02                   | 3.15E-03       |
| response to fungus (GO:0009620)                           | 60            | 30.03           | +                 | 2                      | 4.42E-03       |
| response to gibberellin (GO:0009739)                      | 16            | 3.74            | +                 | 4.27                   | 1.13E-02       |
| signaling (GO:0023052)                                    | 116           | 74.68           | +                 | 1.55                   | 1.24E-02       |
| cellular response to organic substance (GO:0071310)       | 80            | 46.79           | +                 | 1.71                   | 2.07E-02       |
| response to alcohol (GO:0097305)                          | 66            | 36.04           | +                 | 1.83                   | 2.14E-02       |
| defense response to fungus (GO:0050832)                   | 45            | 21.19           | +                 | 2.12                   | 2.22E-02       |
| cell communication (GO:0007154)                           | 121           | 81.14           | +                 | 1.49                   | 4.74E-02       |
| lipid metabolic process (GO:0006629)                      | 68            | 38.85           | +                 | 1.75                   | 4.74E-02       |
| organic acid metabolic process (GO:0006082)               | 99            | 63.03           | +                 | 1.57                   | 4.87E-02       |
| <b>Molecular Function</b>                                 | <b>Gene #</b> | <b>Expected</b> | <b>Over/Under</b> | <b>Fold Enrichment</b> | <b>P-Value</b> |
| RNA binding (GO:0003723)                                  | 10            | 48.9            | -                 | 0.2                    | 3.66E-08       |
| mRNA binding (GO:0003729)                                 | 5             | 31.94           | -                 | 0.16                   | 1.42E-05       |

|                                                           |               |                 |                   |                        |                |
|-----------------------------------------------------------|---------------|-----------------|-------------------|------------------------|----------------|
| catalytic activity, acting on a nucleic acid (GO:0140640) | 5             | 23.27           | -                 | 0.21                   | 2.07E-02       |
| amide transmembrane transporter activity (GO:0042887)     | 10            | 1.69            | +                 | 5.92                   | 3.79E-02       |
| <b>Cellular Component</b>                                 | <b>Gene #</b> | <b>Expected</b> | <b>Over/Under</b> | <b>Fold Enrichment</b> | <b>P-Value</b> |
| protein-containing complex (GO:0032991)                   | 28            | 93.4            | -                 | 0.3                    | 3.52E-13       |
| cell periphery (GO:0071944)                               | 179           | 108.1           | +                 | 1.66                   | 1.99E-08       |
| intracellular non-membrane-bounded organelle (GO:0043232) | 13            | 51.38           | -                 | 0.25                   | 1.32E-07       |
| non-membrane-bounded organelle (GO:0043228)               | 13            | 51.38           | -                 | 0.25                   | 1.32E-07       |
| plasma membrane (GO:0005886)                              | 148           | 92.88           | +                 | 1.59                   | 1.67E-05       |
| extracellular region (GO:0005576)                         | 149           | 94.84           | +                 | 1.57                   | 4.04E-05       |
| catalytic complex (GO:1902494)                            | 12            | 40.87           | -                 | 0.29                   | 1.11E-04       |
| ribonucleoprotein complex (GO:1990904)                    | 2             | 20.89           | -                 | 0.1                    | 3.41E-04       |
| nuclear lumen (GO:0031981)                                | 7             | 29.46           | -                 | 0.24                   | 1.14E-03       |
| intracellular organelle lumen (GO:0070013)                | 11            | 34.83           | -                 | 0.32                   | 3.22E-03       |
| membrane-enclosed lumen (GO:0031974)                      | 11            | 34.83           | -                 | 0.32                   | 3.22E-03       |
| organelle lumen (GO:0043233)                              | 11            | 34.83           | -                 | 0.32                   | 3.22E-03       |
| envelope (GO:0031975)                                     | 14            | 38.73           | -                 | 0.36                   | 4.66E-03       |
| organelle envelope (GO:0031967)                           | 14            | 38.73           | -                 | 0.36                   | 4.66E-03       |
| membrane (GO:0016020)                                     | 203           | 151.84          | +                 | 1.34                   | 8.61E-03       |
| intracellular protein-containing complex (GO:0140535)     | 5             | 22.46           | -                 | 0.22                   | 1.54E-02       |
| nucleus (GO:0005634)                                      | 263           | 319.94          | -                 | 0.82                   | 3.83E-02       |
| plastid stroma (GO:0009532)                               | 6             | 22.67           | -                 | 0.26                   | 4.72E-02       |

Supplemental Table 1: Significant, down-regulated GO Terms for artificially acidified Arabidopsis.

| Biological Process                                                                     | Gene # | Expected | Over/Under | Fold Enrichment | P-Value  |
|----------------------------------------------------------------------------------------|--------|----------|------------|-----------------|----------|
| response to stress (GO:0006950)                                                        | 373    | 139.52   | +          | 2.67            | 1.55E-77 |
| response to chemical (GO:0042221)                                                      | 341    | 133.37   | +          | 2.56            | 2.09E-63 |
| response to stimulus (GO:0050896)                                                      | 477    | 245.57   | +          | 1.94            | 3.29E-63 |
| cellular response to hypoxia (GO:0071456)                                              | 85     | 6.31     | +          | 13.47           | 3.07E-57 |
| cellular response to decreased oxygen levels (GO:0036294)                              | 85     | 6.36     | +          | 13.36           | 5.37E-57 |
| cellular response to oxygen levels (GO:0071453)                                        | 85     | 6.39     | +          | 13.31           | 7.09E-57 |
| cellular response to chemical stimulus (GO:0070887)                                    | 201    | 54.03    | +          | 3.72            | 1.14E-54 |
| response to hypoxia (GO:0001666)                                                       | 89     | 8.53     | +          | 10.44           | 2.88E-52 |
| response to decreased oxygen levels (GO:0036293)                                       | 89     | 8.74     | +          | 10.19           | 1.64E-51 |
| response to oxygen-containing compound (GO:1901700)                                    | 243    | 81.48    | +          | 2.98            | 1.87E-51 |
| response to oxygen levels (GO:0070482)                                                 | 89     | 8.79     | +          | 10.13           | 2.52E-51 |
| response to abiotic stimulus (GO:0009628)                                              | 277    | 108.59   | +          | 2.55            | 1.76E-47 |
| cellular response to stimulus (GO:0051716)                                             | 266    | 102.23   | +          | 2.6             | 1.47E-46 |
| cellular response to stress (GO:0033554)                                               | 142    | 32.07    | +          | 4.43            | 1.93E-44 |
| response to wounding (GO:0009611)                                                      | 110    | 21.51    | +          | 5.11            | 1.50E-38 |
| response to chitin (GO:0010200)                                                        | 71     | 8.13     | +          | 8.73            | 1.26E-36 |
| response to organic substance (GO:0010033)                                             | 232    | 92.54    | +          | 2.51            | 1.91E-36 |
| response to external biotic stimulus (GO:0043207)                                      | 189    | 65.22    | +          | 2.9             | 4.12E-36 |
| response to other organism (GO:0051707)                                                | 189    | 65.22    | +          | 2.9             | 4.12E-36 |
| response to biotic stimulus (GO:0009607)                                               | 189    | 65.27    | +          | 2.9             | 4.58E-36 |
| biological process involved in interspecies interaction between organisms (GO:0044419) | 189    | 65.64    | +          | 2.88            | 9.54E-36 |
| response to external stimulus (GO:0009605)                                             | 207    | 78.31    | +          | 2.64            | 1.23E-34 |

|                                                     |     |        |   |      |          |
|-----------------------------------------------------|-----|--------|---|------|----------|
| response to inorganic substance (GO:0010035)        | 170 | 55.72  | + | 3.05 | 2.21E-34 |
| defense response (GO:0006952)                       | 180 | 64.43  | + | 2.79 | 4.33E-32 |
| response to organonitrogen compound (GO:0010243)    | 90  | 17.1   | + | 5.26 | 1.06E-31 |
| cellular process (GO:0009987)                       | 552 | 392.01 | + | 1.41 | 1.85E-30 |
| response to nitrogen compound (GO:1901698)          | 95  | 20.85  | + | 4.56 | 3.93E-29 |
| defense response to other organism (GO:0098542)     | 159 | 55.85  | + | 2.85 | 1.75E-28 |
| response to fungus (GO:0009620)                     | 103 | 26.26  | + | 3.92 | 6.38E-27 |
| response to oxidative stress (GO:0006979)           | 81  | 16.18  | + | 5.01 | 7.34E-27 |
| response to alcohol (GO:0097305)                    | 111 | 31.51  | + | 3.52 | 1.42E-25 |
| response to lipid (GO:0033993)                      | 145 | 51.07  | + | 2.84 | 2.18E-25 |
| response to bacterium (GO:0009617)                  | 111 | 32.78  | + | 3.39 | 3.12E-24 |
| response to endogenous stimulus (GO:0009719)        | 168 | 67.09  | + | 2.5  | 4.23E-24 |
| response to hormone (GO:0009725)                    | 166 | 66.2   | + | 2.51 | 5.57E-24 |
| defense response to fungus (GO:0050832)             | 82  | 18.53  | + | 4.43 | 6.39E-24 |
| response to abscisic acid (GO:0009737)              | 102 | 28.32  | + | 3.6  | 6.69E-24 |
| response to osmotic stress (GO:0006970)             | 92  | 23.6   | + | 3.9  | 1.68E-23 |
| defense response to bacterium (GO:0042742)          | 98  | 27.16  | + | 3.61 | 6.98E-23 |
| response to temperature stimulus (GO:0009266)       | 89  | 22.86  | + | 3.89 | 1.37E-22 |
| cellular response to organic substance (GO:0071310) | 122 | 40.91  | + | 2.98 | 2.15E-22 |
| response to organic cyclic compound (GO:0014070)    | 86  | 21.56  | + | 3.99 | 2.25E-22 |
| regulation of response to stress (GO:0080134)       | 88  | 23.23  | + | 3.79 | 1.51E-21 |
| regulation of defense response (GO:0031347)         | 79  | 19.64  | + | 4.02 | 1.59E-20 |
| regulation of response to stimulus (GO:0048583)     | 108 | 35.26  | + | 3.06 | 3.12E-20 |

|                                                              |     |        |   |      |          |
|--------------------------------------------------------------|-----|--------|---|------|----------|
| response to salt stress (GO:0009651)                         | 70  | 16.42  | + | 4.26 | 3.68E-19 |
| response to acid chemical (GO:0001101)                       | 94  | 29.19  | + | 3.22 | 1.45E-18 |
| response to salicylic acid (GO:0009751)                      | 58  | 11.61  | + | 4.99 | 2.08E-18 |
| response to water (GO:0009415)                               | 90  | 28.32  | + | 3.18 | 2.73E-17 |
| response to water deprivation (GO:0009414)                   | 86  | 26.39  | + | 3.26 | 5.02E-17 |
| cellular response to endogenous stimulus (GO:0071495)        | 94  | 31.51  | + | 2.98 | 1.87E-16 |
| cellular response to hormone stimulus (GO:0032870)           | 92  | 30.56  | + | 3.01 | 2.79E-16 |
| hormone-mediated signaling pathway (GO:0009755)              | 81  | 24.55  | + | 3.3  | 3.57E-16 |
| cell communication (GO:0007154)                              | 150 | 70.95  | + | 2.11 | 2.06E-14 |
| signaling (GO:0023052)                                       | 141 | 65.3   | + | 2.16 | 6.21E-14 |
| immune system process (GO:0002376)                           | 52  | 12.04  | + | 4.32 | 8.25E-14 |
| signal transduction (GO:0007165)                             | 138 | 63.64  | + | 2.17 | 8.61E-14 |
| cellular response to oxygen-containing compound (GO:1901701) | 85  | 30.09  | + | 2.82 | 2.81E-13 |
| indole-containing compound metabolic process (GO:0042430)    | 33  | 4.8    | + | 6.87 | 5.08E-13 |
| response to heat (GO:0009408)                                | 40  | 7.89   | + | 5.07 | 3.60E-12 |
| biological regulation (GO:0065007)                           | 319 | 217.04 | + | 1.47 | 1.01E-11 |
| response to cold (GO:0009409)                                | 48  | 12.48  | + | 3.84 | 8.31E-11 |
| response to reactive oxygen species (GO:0000302)             | 28  | 4.36   | + | 6.43 | 4.28E-10 |
| response to fatty acid (GO:0070542)                          | 53  | 16.1   | + | 3.29 | 1.12E-09 |
| regulation of cellular process (GO:0050794)                  | 250 | 163.78 | + | 1.53 | 2.22E-09 |
| regulation of biological process (GO:0050789)                | 289 | 198.43 | + | 1.46 | 2.57E-09 |
| response to jasmonic acid (GO:0009753)                       | 52  | 16     | + | 3.25 | 2.94E-09 |
| secondary metabolic process (GO:0019748)                     | 61  | 21.38  | + | 2.85 | 5.62E-09 |

|                                                              |     |        |   |       |          |
|--------------------------------------------------------------|-----|--------|---|-------|----------|
| response to hydrogen peroxide (GO:0042542)                   | 19  | 2.01   | + | 9.47  | 1.09E-08 |
| toxin metabolic process (GO:0009404)                         | 22  | 3.11   | + | 7.06  | 3.50E-08 |
| metabolic process (GO:0008152)                               | 376 | 285.75 | + | 1.32  | 7.12E-08 |
| sulfur compound metabolic process (GO:0006790)               | 44  | 14.49  | + | 3.04  | 1.29E-06 |
| camalexin metabolic process (GO:0052317)                     | 10  | 0.42   | + | 23.68 | 1.33E-06 |
| camalexin biosynthetic process (GO:0010120)                  | 10  | 0.42   | + | 23.68 | 1.33E-06 |
| toxin biosynthetic process (GO:0009403)                      | 10  | 0.53   | + | 18.94 | 6.86E-06 |
| phytoalexin biosynthetic process (GO:0052315)                | 10  | 0.53   | + | 18.94 | 6.86E-06 |
| phytoalexin metabolic process (GO:0052314)                   | 10  | 0.53   | + | 18.94 | 6.86E-06 |
| indole phytoalexin biosynthetic process (GO:0009700)         | 10  | 0.53   | + | 18.94 | 6.86E-06 |
| indole phytoalexin metabolic process (GO:0046217)            | 10  | 0.53   | + | 18.94 | 6.86E-06 |
| cellular metabolic process (GO:0044237)                      | 311 | 233.04 | + | 1.33  | 7.10E-06 |
| photosynthesis (GO:0015979)                                  | 25  | 5.54   | + | 4.51  | 7.42E-06 |
| small molecule metabolic process (GO:0044281)                | 126 | 75.41  | + | 1.67  | 6.18E-05 |
| organic acid metabolic process (GO:0006082)                  | 99  | 55.11  | + | 1.8   | 9.61E-05 |
| response to molecule of bacterial origin (GO:0002237)        | 17  | 3.09   | + | 5.5   | 2.05E-04 |
| protein folding (GO:0006457)                                 | 22  | 5.31   | + | 4.15  | 2.60E-04 |
| oxoacid metabolic process (GO:0043436)                       | 93  | 51.55  | + | 1.8   | 2.66E-04 |
| cellular response to organic cyclic compound (GO:0071407)    | 25  | 6.84   | + | 3.66  | 3.28E-04 |
| indole-containing compound biosynthetic process (GO:0042435) | 13  | 1.87   | + | 6.94  | 6.90E-04 |
| response to carbohydrate (GO:0009743)                        | 20  | 4.72   | + | 4.23  | 7.40E-04 |
| secondary metabolite biosynthetic process (GO:0044550)       | 20  | 4.75   | + | 4.21  | 8.03E-04 |
| indole-containing compound catabolic process (GO:0042436)    | 7   | 0.34   | + | 20.4  | 1.28E-03 |

|                                                                  |     |        |   |       |          |
|------------------------------------------------------------------|-----|--------|---|-------|----------|
| protein complex oligomerization (GO:0051259)                     | 11  | 1.45   | + | 7.58  | 2.74E-03 |
| regulation of immune system process (GO:0002682)                 | 19  | 4.72   | + | 4.02  | 2.99E-03 |
| cellular response to salicylic acid stimulus (GO:0071446)        | 15  | 2.96   | + | 5.07  | 3.06E-03 |
| defense response by callose deposition (GO:0052542)              | 8   | 0.66   | + | 12.12 | 4.42E-03 |
| aromatic compound biosynthetic process (GO:0019438)              | 48  | 22.22  | + | 2.16  | 4.65E-03 |
| indole glucosinolate metabolic process (GO:0042343)              | 7   | 0.5    | + | 13.96 | 9.49E-03 |
| sulfur compound biosynthetic process (GO:0044272)                | 17  | 4.22   | + | 4.03  | 1.09E-02 |
| generation of precursor metabolites and energy (GO:0006091)      | 29  | 10.74  | + | 2.7   | 1.13E-02 |
| immune response (GO:0006955)                                     | 19  | 5.25   | + | 3.62  | 1.26E-02 |
| cellular response to lipid (GO:0071396)                          | 34  | 13.91  | + | 2.44  | 1.43E-02 |
| cellular response to ethylene stimulus (GO:0071369)              | 13  | 2.53   | + | 5.13  | 1.43E-02 |
| callose localization (GO:0052545)                                | 9   | 1.13   | + | 7.93  | 1.96E-02 |
| aromatic compound catabolic process (GO:0019439)                 | 20  | 5.97   | + | 3.35  | 2.03E-02 |
| aromatic amino acid family catabolic process (GO:0009074)        | 7   | 0.58   | + | 12.05 | 2.11E-02 |
| regulation of cellular ketone metabolic process (GO:0010565)     | 14  | 3.09   | + | 4.53  | 2.28E-02 |
| organic substance metabolic process (GO:0071704)                 | 318 | 258.85 | + | 1.23  | 2.72E-02 |
| organonitrogen compound metabolic process (GO:1901564)           | 193 | 143.11 | + | 1.35  | 2.77E-02 |
| cellular macromolecule biosynthetic process (GO:0034645)         | 6   | 25     | - | 0.24  | 2.98E-02 |
| polysaccharide localization (GO:0033037)                         | 9   | 1.21   | + | 7.41  | 3.16E-02 |
| organic cyclic compound metabolic process (GO:1901360)           | 123 | 82.56  | + | 1.49  | 3.62E-02 |
| innate immune response (GO:0045087)                              | 17  | 4.7    | + | 3.62  | 3.97E-02 |
| defense response by callose deposition in cell wall (GO:0052544) | 6   | 0.42   | + | 14.21 | 4.55E-02 |
| organic cyclic compound catabolic process (GO:1901361)           | 20  | 6.33   | + | 3.16  | 4.58E-02 |



|                                                           |               |                 |                   |                        |                |
|-----------------------------------------------------------|---------------|-----------------|-------------------|------------------------|----------------|
| organic cyclic compound biosynthetic process (GO:1901362) | 49            | 25              | +                 | 1.96                   | 4.67E-02       |
| <b>Molecular Function</b>                                 | <b>Gene #</b> | <b>Expected</b> | <b>Over/Under</b> | <b>Fold Enrichment</b> | <b>P-Value</b> |
| catalytic activity (GO:0003824)                           | 317           | 220.34          | +                 | 1.44                   | 1.90E-10       |
| binding (GO:0005488)                                      | 372           | 272.44          | +                 | 1.37                   | 2.25E-10       |
| protein binding (GO:0005515)                              | 224           | 151.11          | +                 | 1.48                   | 6.85E-07       |
| unfolded protein binding (GO:0051082)                     | 18            | 3.01            | +                 | 5.98                   | 1.57E-05       |
| oxidoreductase activity (GO:0016491)                      | 76            | 38.8            | +                 | 1.96                   | 1.43E-04       |
| tetrapyrrole binding (GO:0046906)                         | 29            | 10.58           | +                 | 2.74                   | 5.05E-03       |
| ATP-dependent activity (GO:0140657)                       | 42            | 19.22           | +                 | 2.19                   | 1.31E-02       |
| transferase activity (GO:0016740)                         | 135           | 92.12           | +                 | 1.47                   | 1.47E-02       |
| chlorophyll binding (GO:0016168)                          | 7             | 0.71            | +                 | 9.82                   | 3.80E-02       |
|                                                           |               |                 |                   |                        |                |
| <b>Cellular Component</b>                                 |               |                 |                   |                        |                |
| cell periphery (GO:0071944)                               | 152           | 94.52           | +                 | 1.61                   | 4.12E-06       |
| cytoplasm (GO:0005737)                                    | 470           | 391.56          | +                 | 1.2                    | 4.46E-06       |
| intracellular anatomical structure (GO:0005622)           | 630           | 569.43          | +                 | 1.11                   | 8.28E-06       |
| plant-type cell wall (GO:0009505)                         | 37            | 13.59           | +                 | 2.72                   | 9.80E-05       |
| cell wall (GO:0005618)                                    | 37            | 14.12           | +                 | 2.62                   | 2.36E-04       |
| plasma membrane (GO:0005886)                              | 127           | 81.22           | +                 | 1.56                   | 5.05E-04       |
| external encapsulating structure (GO:0030312)             | 37            | 14.75           | +                 | 2.51                   | 7.38E-04       |
| membrane (GO:0016020)                                     | 180           | 132.76          | +                 | 1.36                   | 1.28E-02       |
| plasmodesma (GO:0009506)                                  | 46            | 23.44           | +                 | 1.96                   | 2.17E-02       |
| cell-cell junction (GO:0005911)                           | 46            | 23.44           | +                 | 1.96                   | 2.17E-02       |
| symplast (GO:0055044)                                     | 46            | 23.44           | +                 | 1.96                   | 2.17E-02       |

|                                                 |               |                 |                   |                        |                |
|-------------------------------------------------|---------------|-----------------|-------------------|------------------------|----------------|
| anchoring junction (GO:0070161)                 | 46            | 23.44           | +                 | 1.96                   | 2.17E-02       |
| cell junction (GO:0030054)                      | 46            | 23.44           | +                 | 1.96                   | 2.17E-02       |
| <b>Cellular Component</b>                       | <b>Gene #</b> | <b>Expected</b> | <b>Over/Under</b> | <b>Fold Enrichment</b> | <b>P-Value</b> |
| cell periphery (GO:0071944)                     | 152           | 94.52           | +                 | 1.61                   | 4.12E-06       |
| cytoplasm (GO:0005737)                          | 470           | 391.56          | +                 | 1.2                    | 4.46E-06       |
| intracellular anatomical structure (GO:0005622) | 630           | 569.43          | +                 | 1.11                   | 8.28E-06       |
| plant-type cell wall (GO:0009505)               | 37            | 13.59           | +                 | 2.72                   | 9.80E-05       |
| cell wall (GO:0005618)                          | 37            | 14.12           | +                 | 2.62                   | 2.36E-04       |
| plasma membrane (GO:0005886)                    | 127           | 81.22           | +                 | 1.56                   | 5.05E-04       |
| external encapsulating structure (GO:0030312)   | 37            | 14.75           | +                 | 2.51                   | 7.38E-04       |
| membrane (GO:0016020)                           | 180           | 132.76          | +                 | 1.36                   | 1.28E-02       |
| plasmodesma (GO:0009506)                        | 46            | 23.44           | +                 | 1.96                   | 2.17E-02       |
| cell-cell junction (GO:0005911)                 | 46            | 23.44           | +                 | 1.96                   | 2.17E-02       |
| symplast (GO:0055044)                           | 46            | 23.44           | +                 | 1.96                   | 2.17E-02       |
| anchoring junction (GO:0070161)                 | 46            | 23.44           | +                 | 1.96                   | 2.17E-02       |
| cell junction (GO:0030054)                      | 46            | 23.44           | +                 | 1.96                   | 2.17E-02       |

Supplemental Table 2: Significant, up-regulated GO Terms for artificially acidified Arabidopsis.

| <b>Biological Process</b>                                                              | <b>Gene #</b> | <b>Expected</b> | <b>Over/Under</b> | <b>Fold Enrichment</b> | <b>P-Value</b> |
|----------------------------------------------------------------------------------------|---------------|-----------------|-------------------|------------------------|----------------|
| response to external biotic stimulus (GO:0043207)                                      | 166           | 30              | +                 | 5.53                   | 6.14E-77       |
| response to other organism (GO:0051707)                                                | 166           | 30              | +                 | 5.53                   | 6.14E-77       |
| response to biotic stimulus (GO:0009607)                                               | 166           | 30.02           | +                 | 5.53                   | 6.89E-77       |
| biological process involved in interspecies interaction between organisms (GO:0044419) | 166           | 30.19           | +                 | 5.5                    | 1.56E-76       |
| defense response (GO:0006952)                                                          | 161           | 29.63           | +                 | 5.43                   | 7.44E-73       |
| response to external stimulus (GO:0009605)                                             | 170           | 36.02           | +                 | 4.72                   | 3.39E-69       |
| response to stress (GO:0006950)                                                        | 216           | 64.17           | +                 | 3.37                   | 6.01E-69       |
| defense response to other organism (GO:0098542)                                        | 148           | 25.69           | +                 | 5.76                   | 1.05E-68       |
| response to bacterium (GO:0009617)                                                     | 112           | 15.08           | +                 | 7.43                   | 1.71E-59       |
| response to stimulus (GO:0050896)                                                      | 263           | 112.95          | +                 | 2.33                   | 2.22E-59       |
| response to fungus (GO:0009620)                                                        | 93            | 12.08           | +                 | 7.7                    | 3.23E-49       |
| response to oxygen-containing compound (GO:1901700)                                    | 149           | 37.48           | +                 | 3.98                   | 5.27E-49       |
| cellular response to chemical stimulus (GO:0070887)                                    | 124           | 24.85           | +                 | 4.99                   | 9.78E-49       |
| defense response to bacterium (GO:0042742)                                             | 93            | 12.49           | +                 | 7.44                   | 4.74E-48       |
| response to chitin (GO:0010200)                                                        | 61            | 3.74            | +                 | 16.31                  | 1.21E-47       |
| response to organic substance (GO:0010033)                                             | 156           | 42.56           | +                 | 3.67                   | 1.51E-47       |
| response to chemical (GO:0042221)                                                      | 184           | 61.34           | +                 | 3                      | 1.22E-46       |
| cellular response to stimulus (GO:0051716)                                             | 162           | 47.02           | +                 | 3.45                   | 1.66E-46       |
| defense response to fungus (GO:0050832)                                                | 79            | 8.52            | +                 | 9.27                   | 2.40E-46       |
| response to organonitrogen compound (GO:0010243)                                       | 76            | 7.87            | +                 | 9.66                   | 1.48E-45       |
| response to organic cyclic compound (GO:0014070)                                       | 79            | 9.92            | +                 | 7.97                   | 7.27E-42       |
| response to nitrogen compound (GO:1901698)                                             | 77            | 9.59            | +                 | 8.03                   | 6.77E-41       |

|                                                              |     |       |   |       |          |
|--------------------------------------------------------------|-----|-------|---|-------|----------|
| regulation of response to stress (GO:0080134)                | 79  | 10.68 | + | 7.39  | 1.10E-39 |
| regulation of defense response (GO:0031347)                  | 74  | 9.03  | + | 8.19  | 1.17E-39 |
| response to salicylic acid (GO:0009751)                      | 59  | 5.34  | + | 11.05 | 2.57E-37 |
| cellular response to organic substance (GO:0071310)          | 96  | 18.82 | + | 5.1   | 1.53E-36 |
| signal transduction (GO:0007165)                             | 117 | 29.27 | + | 4     | 3.55E-36 |
| signaling (GO:0023052)                                       | 118 | 30.03 | + | 3.93  | 7.45E-36 |
| regulation of response to stimulus (GO:0048583)              | 89  | 16.22 | + | 5.49  | 9.88E-36 |
| response to wounding (GO:0009611)                            | 72  | 9.89  | + | 7.28  | 2.72E-35 |
| cell communication (GO:0007154)                              | 118 | 32.63 | + | 3.62  | 1.72E-32 |
| response to endogenous stimulus (GO:0009719)                 | 112 | 30.86 | + | 3.63  | 1.50E-30 |
| response to hormone (GO:0009725)                             | 110 | 30.45 | + | 3.61  | 1.08E-29 |
| response to lipid (GO:0033993)                               | 96  | 23.49 | + | 4.09  | 4.68E-29 |
| cellular response to oxygen-containing compound (GO:1901701) | 75  | 13.84 | + | 5.42  | 6.30E-29 |
| cellular response to endogenous stimulus (GO:0071495)        | 74  | 14.5  | + | 5.11  | 6.56E-27 |
| response to abiotic stimulus (GO:0009628)                    | 137 | 49.94 | + | 2.74  | 9.38E-27 |
| cellular response to hormone stimulus (GO:0032870)           | 72  | 14.06 | + | 5.12  | 3.84E-26 |
| hormone-mediated signaling pathway (GO:0009755)              | 64  | 11.29 | + | 5.67  | 4.41E-25 |
| regulation of cellular process (GO:0050794)                  | 166 | 75.33 | + | 2.2   | 2.25E-23 |
| response to jasmonic acid (GO:0009753)                       | 51  | 7.36  | + | 6.93  | 5.67E-23 |
| response to fatty acid (GO:0070542)                          | 51  | 7.41  | + | 6.89  | 7.52E-23 |
| cellular process (GO:0009987)                                | 273 | 180.3 | + | 1.51  | 9.81E-23 |
| regulation of biological process (GO:0050789)                | 182 | 91.27 | + | 1.99  | 1.02E-21 |
| cellular response to hypoxia (GO:0071456)                    | 34  | 2.9   | + | 11.72 | 5.67E-21 |

|                                                           |     |       |   |       |          |
|-----------------------------------------------------------|-----|-------|---|-------|----------|
| cellular response to decreased oxygen levels (GO:0036294) | 34  | 2.93  | + | 11.62 | 7.23E-21 |
| cellular response to oxygen levels (GO:0071453)           | 34  | 2.94  | + | 11.57 | 8.16E-21 |
| biological regulation (GO:0065007)                        | 188 | 99.83 | + | 1.88  | 8.73E-20 |
| response to hypoxia (GO:0001666)                          | 36  | 3.92  | + | 9.18  | 4.31E-19 |
| response to decreased oxygen levels (GO:0036293)          | 36  | 4.02  | + | 8.96  | 9.12E-19 |
| response to oxygen levels (GO:0070482)                    | 36  | 4.04  | + | 8.91  | 1.10E-18 |
| response to alcohol (GO:0097305)                          | 62  | 14.5  | + | 4.28  | 4.32E-18 |
| regulation of immune system process (GO:0002682)          | 27  | 2.17  | + | 12.42 | 9.63E-17 |
| response to acid chemical (GO:0001101)                    | 57  | 13.43 | + | 4.25  | 3.27E-16 |
| response to molecule of bacterial origin (GO:0002237)     | 23  | 1.42  | + | 16.19 | 3.46E-16 |
| response to water deprivation (GO:0009414)                | 54  | 12.14 | + | 4.45  | 4.82E-16 |
| response to inorganic substance (GO:0010035)              | 79  | 25.63 | + | 3.08  | 1.15E-15 |
| response to abscisic acid (GO:0009737)                    | 55  | 13.03 | + | 4.22  | 1.98E-15 |
| response to water (GO:0009415)                            | 55  | 13.03 | + | 4.22  | 1.98E-15 |
| cellular response to organic cyclic compound (GO:0071407) | 28  | 3.14  | + | 8.91  | 5.46E-14 |
| cellular response to salicylic acid stimulus (GO:0071446) | 20  | 1.36  | + | 14.71 | 4.53E-13 |
| immune system process (GO:0002376)                        | 34  | 5.54  | + | 6.14  | 6.48E-13 |
| systemic acquired resistance (GO:0009627)                 | 20  | 1.41  | + | 14.2  | 8.27E-13 |
| response to osmotic stress (GO:0006970)                   | 46  | 10.85 | + | 4.24  | 1.77E-12 |
| cellular response to stress (GO:0033554)                  | 52  | 14.75 | + | 3.53  | 2.43E-11 |
| response to temperature stimulus (GO:0009266)             | 41  | 10.51 | + | 3.9   | 1.06E-09 |
| phosphorylation (GO:0016310)                              | 48  | 14.19 | + | 3.38  | 1.28E-09 |
| protein phosphorylation (GO:0006468)                      | 45  | 12.83 | + | 3.51  | 2.30E-09 |

|                                                               |    |       |   |       |          |
|---------------------------------------------------------------|----|-------|---|-------|----------|
| salicylic acid mediated signaling pathway (GO:0009863)        | 14 | 0.97  | + | 14.42 | 2.18E-08 |
| response to oxidative stress (GO:0006979)                     | 32 | 7.44  | + | 4.3   | 4.58E-08 |
| regulation of cellular ketone metabolic process (GO:0010565)  | 15 | 1.42  | + | 10.56 | 2.08E-07 |
| indole-containing compound metabolic process (GO:0042430)     | 17 | 2.21  | + | 7.69  | 1.05E-06 |
| regulation of small molecule metabolic process (GO:0062012)   | 15 | 2.04  | + | 7.35  | 2.04E-05 |
| phosphate-containing compound metabolic process (GO:0006796)  | 53 | 22.81 | + | 2.32  | 4.52E-05 |
| phosphorus metabolic process (GO:0006793)                     | 53 | 23.36 | + | 2.27  | 1.11E-04 |
| response to cold (GO:0009409)                                 | 23 | 5.74  | + | 4.01  | 1.28E-04 |
| jasmonic acid mediated signaling pathway (GO:0009867)         | 13 | 1.76  | + | 7.39  | 2.00E-04 |
| cellular response to lipid (GO:0071396)                       | 24 | 6.4   | + | 3.75  | 2.09E-04 |
| response to salt stress (GO:0009651)                          | 26 | 7.55  | + | 3.44  | 2.97E-04 |
| cellular response to jasmonic acid stimulus (GO:0071395)      | 13 | 1.85  | + | 7.05  | 3.34E-04 |
| cellular response to fatty acid (GO:0071398)                  | 13 | 1.89  | + | 6.86  | 4.42E-04 |
| gene expression (GO:0010467)                                  | 2  | 20.81 | - | 0.1   | 7.59E-04 |
| immune response (GO:0006955)                                  | 14 | 2.42  | + | 5.8   | 1.02E-03 |
| innate immune response (GO:0045087)                           | 13 | 2.16  | + | 6.02  | 1.81E-03 |
| oxoacid metabolic process (GO:0043436)                        | 50 | 23.71 | + | 2.11  | 2.92E-03 |
| regulation of response to biotic stimulus (GO:0002831)        | 13 | 2.37  | + | 5.49  | 4.74E-03 |
| regulation of cell death (GO:0010941)                         | 10 | 1.36  | + | 7.35  | 6.92E-03 |
| regulation of response to external stimulus (GO:0032101)      | 13 | 2.55  | + | 5.1   | 1.02E-02 |
| nucleobase-containing compound metabolic process (GO:0006139) | 7  | 27.61 | - | 0.25  | 1.34E-02 |
| positive regulation of defense response (GO:0031349)          | 9  | 1.18  | + | 7.64  | 1.67E-02 |
| organic acid metabolic process (GO:0006082)                   | 50 | 25.35 | + | 1.97  | 1.86E-02 |

|                                                                              |               |                 |                   |                        |                |
|------------------------------------------------------------------------------|---------------|-----------------|-------------------|------------------------|----------------|
| indole glucosinolate metabolic process (GO:0042343)                          | 5             | 0.23            | +                 | 21.68                  | 2.60E-02       |
| response to oomycetes (GO:0002239)                                           | 9             | 1.27            | +                 | 7.06                   | 3.03E-02       |
| RNA metabolic process (GO:0016070)                                           | 2             | 16.86           | -                 | 0.12                   | 3.44E-02       |
| nucleic acid metabolic process (GO:0090304)                                  | 5             | 22.77           | -                 | 0.22                   | 4.05E-02       |
| regulation of cell communication (GO:0010646)                                | 18            | 5.39            | +                 | 3.34                   | 4.30E-02       |
| protein modification process (GO:0036211)                                    | 58            | 32.28           | +                 | 1.8                    | 4.78E-02       |
| <b>Molecular Function</b>                                                    | <b>Gene #</b> | <b>Expected</b> | <b>Over/Under</b> | <b>Fold Enrichment</b> | <b>P-Value</b> |
| ADP binding (GO:0043531)                                                     | 22            | 2.08            | +                 | 10.6                   | 3.77E-12       |
| kinase activity (GO:0016301)                                                 | 53            | 15.73           | +                 | 3.37                   | 4.41E-11       |
| protein kinase activity (GO:0004672)                                         | 44            | 12.64           | +                 | 3.48                   | 3.15E-09       |
| transferase activity, transferring phosphorus-containing groups (GO:0016772) | 54            | 18.29           | +                 | 2.95                   | 3.82E-09       |
| protein serine/threonine kinase activity (GO:0004674)                        | 36            | 9.26            | +                 | 3.89                   | 2.09E-08       |
| phosphotransferase activity, alcohol group as acceptor (GO:0016773)          | 45            | 14.56           | +                 | 3.09                   | 7.83E-08       |
| transferase activity (GO:0016740)                                            | 81            | 42.37           | +                 | 1.91                   | 2.22E-05       |
| adenyl ribonucleotide binding (GO:0032559)                                   | 28            | 8.12            | +                 | 3.45                   | 5.37E-05       |
| adenyl nucleotide binding (GO:0030554)                                       | 28            | 8.26            | +                 | 3.39                   | 7.45E-05       |
| catalytic activity, acting on a protein (GO:0140096)                         | 63            | 31.61           | +                 | 1.99                   | 2.98E-04       |
| anion binding (GO:0043168)                                                   | 39            | 15.53           | +                 | 2.51                   | 5.36E-04       |
| purine ribonucleotide binding (GO:0032555)                                   | 29            | 9.7             | +                 | 2.99                   | 5.49E-04       |
| purine nucleotide binding (GO:0017076)                                       | 29            | 9.86            | +                 | 2.94                   | 7.55E-04       |
| carbohydrate derivative binding (GO:0097367)                                 | 30            | 10.49           | +                 | 2.86                   | 8.37E-04       |
| ribonucleotide binding (GO:0032553)                                          | 29            | 10.05           | +                 | 2.89                   | 1.11E-03       |
| transmembrane signaling receptor activity (GO:0004888)                       | 12            | 1.93            | +                 | 6.22                   | 2.09E-03       |

|                                                             |               |                 |                   |                        |                |
|-------------------------------------------------------------|---------------|-----------------|-------------------|------------------------|----------------|
| ion binding (GO:0043167)                                    | 63            | 34.04           | +                 | 1.85                   | 3.48E-03       |
| signaling receptor activity (GO:0038023)                    | 13            | 2.6             | +                 | 5                      | 7.29E-03       |
| transmembrane receptor protein kinase activity (GO:0019199) | 10            | 1.52            | +                 | 6.59                   | 1.01E-02       |
| small molecule binding (GO:0036094)                         | 37            | 16.45           | +                 | 2.25                   | 1.10E-02       |
| binding (GO:0005488)                                        | 164           | 125.31          | +                 | 1.31                   | 3.36E-02       |
| <b>Cellular Component</b>                                   | <b>Gene #</b> | <b>Expected</b> | <b>Over/Under</b> | <b>Fold Enrichment</b> | <b>P-Value</b> |
| cell periphery (GO:0071944)                                 | 98            | 43.47           | +                 | 2.25                   | 4.58E-12       |
| plasma membrane (GO:0005886)                                | 86            | 37.35           | +                 | 2.3                    | 1.38E-10       |
| membrane (GO:0016020)                                       | 109           | 61.06           | +                 | 1.79                   | 2.69E-07       |

Supplemental Table 3: Significant, down-regulated GO Terms for severe-cold challenged Arabidopsis.



| <b>Biological Process</b>                             | <b>Gene #</b> | <b>Expected</b> | <b>Over/Under</b> | <b>Fold Enrichment</b> | <b>P-Value</b> |
|-------------------------------------------------------|---------------|-----------------|-------------------|------------------------|----------------|
| response to stimulus (GO:0050896)                     | 224           | 128.21          | +                 | 1.75                   | 7.89E-20       |
| response to chemical (GO:0042221)                     | 137           | 69.63           | +                 | 1.97                   | 1.85E-12       |
| response to stress (GO:0006950)                       | 138           | 72.84           | +                 | 1.89                   | 3.23E-11       |
| response to abiotic stimulus (GO:0009628)             | 113           | 56.69           | +                 | 1.99                   | 9.74E-10       |
| response to organic substance (GO:0010033)            | 97            | 48.31           | +                 | 2.01                   | 6.95E-08       |
| response to endogenous stimulus (GO:0009719)          | 78            | 35.03           | +                 | 2.23                   | 9.49E-08       |
| response to hormone (GO:0009725)                      | 77            | 34.56           | +                 | 2.23                   | 1.32E-07       |
| cellular response to stimulus (GO:0051716)            | 98            | 53.37           | +                 | 1.84                   | 6.05E-06       |
| response to lipid (GO:0033993)                        | 60            | 26.67           | +                 | 2.25                   | 2.39E-05       |
| biological regulation (GO:0065007)                    | 167           | 113.32          | +                 | 1.47                   | 2.82E-05       |
| cellular response to chemical stimulus (GO:0070887)   | 61            | 28.21           | +                 | 2.16                   | 6.37E-05       |
| response to wounding (GO:0009611)                     | 34            | 11.23           | +                 | 3.03                   | 7.24E-05       |
| response to oxygen-containing compound (GO:1901700)   | 79            | 42.54           | +                 | 1.86                   | 2.44E-04       |
| protein complex oligomerization (GO:0051259)          | 9             | 0.76            | +                 | 11.87                  | 6.28E-04       |
| cellular process (GO:0009987)                         | 255           | 204.67          | +                 | 1.25                   | 6.96E-04       |
| cellular response to organic substance (GO:0071310)   | 48            | 21.36           | +                 | 2.25                   | 8.60E-04       |
| response to decreased oxygen levels (GO:0036293)      | 19            | 4.56            | +                 | 4.17                   | 1.21E-03       |
| cellular response to endogenous stimulus (GO:0071495) | 40            | 16.45           | +                 | 2.43                   | 1.28E-03       |
| response to oxygen levels (GO:0070482)                | 19            | 4.59            | +                 | 4.14                   | 1.32E-03       |
| cellular response to hormone stimulus (GO:0032870)    | 39            | 15.96           | +                 | 2.44                   | 1.63E-03       |
| regulation of biological process (GO:0050789)         | 149           | 103.6           | +                 | 1.44                   | 1.65E-03       |
| response to radiation (GO:0009314)                    | 56            | 28.18           | +                 | 1.99                   | 3.54E-03       |

|                                                                                        |               |                 |                   |                        |                |
|----------------------------------------------------------------------------------------|---------------|-----------------|-------------------|------------------------|----------------|
| response to external stimulus (GO:0009605)                                             | 73            | 40.89           | +                 | 1.79                   | 3.65E-03       |
| response to hypoxia (GO:0001666)                                                       | 18            | 4.45            | +                 | 4.04                   | 3.66E-03       |
| response to light stimulus (GO:0009416)                                                | 55            | 27.6            | +                 | 1.99                   | 4.37E-03       |
| response to alcohol (GO:0097305)                                                       | 38            | 16.45           | +                 | 2.31                   | 9.54E-03       |
| response to abscisic acid (GO:0009737)                                                 | 35            | 14.79           | +                 | 2.37                   | 1.22E-02       |
| negative regulation of response to stimulus (GO:0048585)                               | 15            | 3.56            | +                 | 4.22                   | 1.75E-02       |
| response to osmotic stress (GO:0006970)                                                | 31            | 12.32           | +                 | 2.52                   | 2.11E-02       |
| regulation of phenylpropanoid metabolic process (GO:2000762)                           | 6             | 0.4             | +                 | 15.01                  | 2.16E-02       |
| regulation of cellular process (GO:0050794)                                            | 124           | 85.51           | +                 | 1.45                   | 2.36E-02       |
| response to oxidative stress (GO:0006979)                                              | 24            | 8.45            | +                 | 2.84                   | 2.49E-02       |
| hormone-mediated signaling pathway (GO:0009755)                                        | 31            | 12.82           | +                 | 2.42                   | 3.30E-02       |
| response to external biotic stimulus (GO:0043207)                                      | 61            | 34.05           | +                 | 1.79                   | 3.75E-02       |
| response to other organism (GO:0051707)                                                | 61            | 34.05           | +                 | 1.79                   | 3.75E-02       |
| response to biotic stimulus (GO:0009607)                                               | 61            | 34.08           | +                 | 1.79                   | 3.79E-02       |
| biological process involved in interspecies interaction between organisms (GO:0044419) | 61            | 34.27           | +                 | 1.78                   | 4.09E-02       |
| <b>Molecular Function</b>                                                              | <b>Gene #</b> | <b>Expected</b> | <b>Over/Under</b> | <b>Fold Enrichment</b> | <b>P-Value</b> |
| hormone binding (GO:0042562)                                                           | 8             | 0.45            | +                 | 17.59                  | 1.25E-04       |
| RNA binding (GO:0003723)                                                               | 4             | 22.32           | -                 | 0.18                   | 6.95E-03       |
| DNA-binding transcription factor activity (GO:0003700)                                 | 47            | 22.96           | +                 | 2.05                   | 7.93E-03       |
| <b>Cellular Component</b>                                                              | <b>Gene #</b> | <b>Expected</b> | <b>Over/Under</b> | <b>Fold Enrichment</b> | <b>P-Value</b> |
| plasma membrane (GO:0005886)                                                           | 89            | 42.4            | +                 | 2.1                    | 1.73E-08       |
| cell periphery (GO:0071944)                                                            | 98            | 49.35           | +                 | 1.99                   | 2.38E-08       |
| membrane (GO:0016020)                                                                  | 109           | 69.32           | +                 | 1.57                   | 6.25E-04       |

Supplemental Table 4: Significant, up-regulated GO Terms for severe-cold challenged Arabidopsis.

| <b>Biological Process</b>                                                              | <b>Gene #</b> | <b>Expected</b> | <b>Over/Under</b> | <b>Fold enrichment</b> | <b>P-value</b> |
|----------------------------------------------------------------------------------------|---------------|-----------------|-------------------|------------------------|----------------|
| response to stimulus (GO:0050896)                                                      | 402           | 279.15          | +                 | 1.44                   | 1.33E-14       |
| response to stress (GO:0006950)                                                        | 260           | 158.6           | +                 | 1.64                   | 4.08E-13       |
| regulation of biological process (GO:0050789)                                          | 335           | 225.57          | +                 | 1.49                   | 2.06E-12       |
| response to chemical (GO:0042221)                                                      | 248           | 151.61          | +                 | 1.64                   | 3.90E-12       |
| response to wounding (GO:0009611)                                                      | 73            | 24.45           | +                 | 2.99                   | 5.30E-12       |
| response to oxygen-containing compound (GO:1901700)                                    | 171           | 92.62           | +                 | 1.85                   | 3.15E-11       |
| biological regulation (GO:0065007)                                                     | 353           | 246.72          | +                 | 1.43                   | 4.05E-11       |
| regulation of cellular process (GO:0050794)                                            | 283           | 186.17          | +                 | 1.52                   | 1.43E-10       |
| cellular process (GO:0009987)                                                          | 549           | 445.61          | +                 | 1.23                   | 1.74E-09       |
| cellular response to chemical stimulus (GO:0070887)                                    | 121           | 61.42           | +                 | 1.97                   | 1.15E-08       |
| response to external biotic stimulus (GO:0043207)                                      | 138           | 74.14           | +                 | 1.86                   | 1.34E-08       |
| response to other organism (GO:0051707)                                                | 138           | 74.14           | +                 | 1.86                   | 1.34E-08       |
| response to biotic stimulus (GO:0009607)                                               | 138           | 74.2            | +                 | 1.86                   | 1.38E-08       |
| biological process involved in interspecies interaction between organisms (GO:0044419) | 138           | 74.62           | +                 | 1.85                   | 2.31E-08       |
| response to external stimulus (GO:0009605)                                             | 157           | 89.02           | +                 | 1.76                   | 2.40E-08       |
| response to organic substance (GO:0010033)                                             | 176           | 105.19          | +                 | 1.67                   | 5.15E-08       |
| response to endogenous stimulus (GO:0009719)                                           | 136           | 76.27           | +                 | 1.78                   | 4.47E-07       |
| cellular response to stimulus (GO:0051716)                                             | 186           | 116.2           | +                 | 1.6                    | 4.69E-07       |
| cellular response to organic substance (GO:0071310)                                    | 95            | 46.51           | +                 | 2.04                   | 5.71E-07       |
| response to salt stress (GO:0009651)                                                   | 52            | 18.66           | +                 | 2.79                   | 7.03E-07       |
| regulation of response to stimulus (GO:0048583)                                        | 85            | 40.08           | +                 | 2.12                   | 1.12E-06       |
| response to hormone (GO:0009725)                                                       | 133           | 75.25           | +                 | 1.77                   | 1.16E-06       |

|                                                                 |     |        |   |      |          |
|-----------------------------------------------------------------|-----|--------|---|------|----------|
| defense response to other organism (GO:0098542)                 | 117 | 63.49  | + | 1.84 | 1.43E-06 |
| positive regulation of biological process (GO:0048518)          | 92  | 45.82  | + | 2.01 | 3.06E-06 |
| regulation of metabolic process (GO:0019222)                    | 183 | 117.64 | + | 1.56 | 5.65E-06 |
| cellular response to endogenous stimulus (GO:0071495)           | 77  | 35.82  | + | 2.15 | 5.82E-06 |
| response to osmotic stress (GO:0006970)                         | 63  | 26.82  | + | 2.35 | 5.93E-06 |
| regulation of biosynthetic process (GO:0009889)                 | 134 | 78.1   | + | 1.72 | 7.04E-06 |
| cellular response to oxygen-containing compound (GO:1901701)    | 74  | 34.2   | + | 2.16 | 7.60E-06 |
| response to lipid (GO:0033993)                                  | 107 | 58.06  | + | 1.84 | 8.92E-06 |
| response to alcohol (GO:0097305)                                | 76  | 35.82  | + | 2.12 | 1.02E-05 |
| defense response (GO:0006952)                                   | 127 | 73.24  | + | 1.73 | 1.10E-05 |
| cellular response to hormone stimulus (GO:0032870)              | 74  | 34.74  | + | 2.13 | 1.71E-05 |
| hormone-mediated signaling pathway (GO:0009755)                 | 63  | 27.9   | + | 2.26 | 3.62E-05 |
| cell communication (GO:0007154)                                 | 134 | 80.65  | + | 1.66 | 3.64E-05 |
| response to abscisic acid (GO:0009737)                          | 69  | 32.19  | + | 2.14 | 4.13E-05 |
| regulation of cellular biosynthetic process (GO:0031326)        | 128 | 76.42  | + | 1.67 | 6.38E-05 |
| response to abiotic stimulus (GO:0009628)                       | 185 | 123.43 | + | 1.5  | 6.85E-05 |
| positive regulation of metabolic process (GO:0009893)           | 64  | 29.16  | + | 2.19 | 7.55E-05 |
| signal transduction (GO:0007165)                                | 122 | 72.34  | + | 1.69 | 8.72E-05 |
| signaling (GO:0023052)                                          | 124 | 74.23  | + | 1.67 | 1.22E-04 |
| regulation of DNA-templated transcription (GO:0006355)          | 112 | 65.53  | + | 1.71 | 1.88E-04 |
| regulation of nucleic acid-templated transcription (GO:1903506) | 112 | 65.56  | + | 1.71 | 1.91E-04 |
| regulation of macromolecule biosynthetic process (GO:0010556)   | 119 | 70.99  | + | 1.68 | 1.92E-04 |
| regulation of RNA biosynthetic process (GO:2001141)             | 112 | 65.62  | + | 1.71 | 1.95E-04 |

|                                                                |     |        |   |      |          |
|----------------------------------------------------------------|-----|--------|---|------|----------|
| response to bacterium (GO:0009617)                             | 73  | 37.26  | + | 1.96 | 4.19E-04 |
| negative regulation of biological process (GO:0048519)         | 98  | 55.87  | + | 1.75 | 4.40E-04 |
| developmental process (GO:0032502)                             | 238 | 173.75 | + | 1.37 | 6.15E-04 |
| response to organonitrogen compound (GO:0010243)               | 46  | 19.44  | + | 2.37 | 8.02E-04 |
| positive regulation of cellular process (GO:0048522)           | 71  | 36.84  | + | 1.93 | 1.34E-03 |
| response to acid chemical (GO:0001101)                         | 66  | 33.18  | + | 1.99 | 1.39E-03 |
| regulation of cellular metabolic process (GO:0031323)          | 145 | 95.14  | + | 1.52 | 1.53E-03 |
| multicellular organism development (GO:0007275)                | 187 | 130.82 | + | 1.43 | 1.54E-03 |
| regulation of nitrogen compound metabolic process (GO:0051171) | 134 | 86.08  | + | 1.56 | 1.57E-03 |
| response to water (GO:0009415)                                 | 64  | 32.19  | + | 1.99 | 1.63E-03 |
| response to organic cyclic compound (GO:0014070)               | 53  | 24.51  | + | 2.16 | 1.64E-03 |
| regulation of macromolecule metabolic process (GO:0060255)     | 147 | 97.36  | + | 1.51 | 2.01E-03 |
| response to jasmonic acid (GO:0009753)                         | 43  | 18.18  | + | 2.36 | 2.08E-03 |
| regulation of RNA metabolic process (GO:0051252)               | 113 | 69.43  | + | 1.63 | 2.16E-03 |
| defense response to bacterium (GO:0042742)                     | 62  | 30.87  | + | 2.01 | 2.35E-03 |
| response to fatty acid (GO:0070542)                            | 43  | 18.3   | + | 2.35 | 2.38E-03 |
| metabolic process (GO:0008152)                                 | 394 | 324.82 | + | 1.21 | 4.49E-03 |
| regulation of gene expression (GO:0010468)                     | 129 | 83.86  | + | 1.54 | 5.15E-03 |
| protein ubiquitination (GO:0016567)                            | 47  | 21.54  | + | 2.18 | 5.47E-03 |
| response to nitrogen compound (GO:1901698)                     | 50  | 23.7   | + | 2.11 | 6.08E-03 |
| response to fungus (GO:0009620)                                | 59  | 29.85  | + | 1.98 | 6.60E-03 |
| response to chitin (GO:0010200)                                | 27  | 9.24   | + | 2.92 | 6.77E-03 |
| response to water deprivation (GO:0009414)                     | 59  | 30     | + | 1.97 | 7.11E-03 |

|                                                                             |               |                 |                   |                        |                |
|-----------------------------------------------------------------------------|---------------|-----------------|-------------------|------------------------|----------------|
| multicellular organismal process (GO:0032501)                               | 194           | 140.24          | +                 | 1.38                   | 8.00E-03       |
| anatomical structure development (GO:0048856)                               | 215           | 159.32          | +                 | 1.35                   | 1.01E-02       |
| regulation of nucleobase-containing compound metabolic process (GO:0019219) | 115           | 73.48           | +                 | 1.57                   | 1.03E-02       |
| regulation of primary metabolic process (GO:0080090)                        | 132           | 87.49           | +                 | 1.51                   | 1.05E-02       |
| regulation of response to stress (GO:0080134)                               | 53            | 26.4            | +                 | 2.01                   | 1.23E-02       |
| protein modification process (GO:0036211)                                   | 122           | 79.78           | +                 | 1.53                   | 1.33E-02       |
| organic substance metabolic process (GO:0071704)                            | 359           | 294.25          | +                 | 1.22                   | 1.44E-02       |
| protein modification by small protein conjugation (GO:0032446)              | 47            | 22.59           | +                 | 2.08                   | 1.75E-02       |
| programmed cell death (GO:0012501)                                          | 13            | 2.67            | +                 | 4.87                   | 2.60E-02       |
| positive regulation of macromolecule metabolic process (GO:0010604)         | 50            | 25.08           | +                 | 1.99                   | 2.94E-02       |
| positive regulation of biosynthetic process (GO:0009891)                    | 41            | 18.75           | +                 | 2.19                   | 3.17E-02       |
| secondary metabolic process (GO:0019748)                                    | 49            | 24.3            | +                 | 2.02                   | 3.32E-02       |
| programmed cell death induced by symbiont (GO:0034050)                      | 10            | 1.56            | +                 | 6.41                   | 3.48E-02       |
| response to inorganic substance (GO:0010035)                                | 100           | 63.34           | +                 | 1.58                   | 3.73E-02       |
| regulation of defense response (GO:0031347)                                 | 46            | 22.32           | +                 | 2.06                   | 3.82E-02       |
| biological process involved in interaction with symbiont (GO:0051702)       | 10            | 1.59            | +                 | 6.29                   | 4.03E-02       |
| negative regulation of cellular process (GO:0048523)                        | 62            | 33.96           | +                 | 1.83                   | 4.03E-02       |
| <b>Molecular Function</b>                                                   | <b>Gene #</b> | <b>Expected</b> | <b>Over/Under</b> | <b>Fold enrichment</b> | <b>P-value</b> |
| protein binding (GO:0005515)                                                | 262           | 171.77          | +                 | 1.53                   | 8.53E-10       |
| binding (GO:0005488)                                                        | 401           | 309.7           | +                 | 1.29                   | 3.47E-07       |
| transferase activity (GO:0016740)                                           | 160           | 104.71          | +                 | 1.53                   | 1.54E-04       |
| DNA binding (GO:0003677)                                                    | 96            | 55.6            | +                 | 1.73                   | 7.34E-04       |
| DNA-binding transcription factor activity (GO:0003700)                      | 82            | 49.99           | +                 | 1.64                   | 4.46E-02       |

| <b>Cellular Component</b>                       | <b>Gene #</b> | <b>Expected</b> | <b>Over/Under</b> | <b>Fold enrichment</b> | <b>P-value</b> |
|-------------------------------------------------|---------------|-----------------|-------------------|------------------------|----------------|
| intracellular anatomical structure (GO:0005622) | 709           | 647.3           | +                 | 1.1                    | 4.75E-05       |
| nucleus (GO:0005634)                            | 380           | 318.01          | +                 | 1.19                   | 1.05E-02       |
| cellular anatomical entity (GO:0110165)         | 772           | 735.81          | +                 | 1.05                   | 1.23E-02       |

Supplemental Table 5: Significant, down-regulated GO Terms for artificially acidified sorghum



| <b>Biological Process</b>                                    | <b>Gene #</b> | <b>Expected</b> | <b>Over/Under</b> | <b>Fold enrichment</b> | <b>P-value</b> |
|--------------------------------------------------------------|---------------|-----------------|-------------------|------------------------|----------------|
| photosynthesis (GO:0015979)                                  | 74            | 8.46            | +                 | 8.75                   | 1.28E-36       |
| cellular metabolic process (GO:0044237)                      | 570           | 355.67          | +                 | 1.6                    | 2.50E-35       |
| response to abiotic stimulus (GO:0009628)                    | 336           | 165.73          | +                 | 2.03                   | 3.86E-33       |
| photosynthesis, light reaction (GO:0019684)                  | 60            | 5.72            | +                 | 10.49                  | 9.26E-33       |
| response to light stimulus (GO:0009416)                      | 208           | 80.69           | +                 | 2.58                   | 1.48E-30       |
| response to radiation (GO:0009314)                           | 211           | 82.38           | +                 | 2.56                   | 1.50E-30       |
| metabolic process (GO:0008152)                               | 639           | 436.12          | +                 | 1.47                   | 6.16E-30       |
| cellular process (GO:0009987)                                | 794           | 598.3           | +                 | 1.33                   | 8.43E-29       |
| generation of precursor metabolites and energy (GO:0006091)  | 82            | 16.4            | +                 | 5                      | 5.00E-26       |
| cellular biosynthetic process (GO:0044249)                   | 246           | 115.7           | +                 | 2.13                   | 6.39E-25       |
| biosynthetic process (GO:0009058)                            | 270           | 134.03          | +                 | 2.01                   | 1.63E-24       |
| organic substance biosynthetic process (GO:1901576)          | 257           | 125.65          | +                 | 2.05                   | 6.37E-24       |
| tetrapyrrole metabolic process (GO:0033013)                  | 63            | 10.68           | +                 | 5.9                    | 9.42E-23       |
| porphyrin-containing compound metabolic process (GO:0006778) | 58            | 8.9             | +                 | 6.51                   | 1.30E-22       |
| response to stimulus (GO:0050896)                            | 538           | 374.81          | +                 | 1.44                   | 1.49E-19       |
| organonitrogen compound biosynthetic process (GO:1901566)    | 143           | 57.65           | +                 | 2.48                   | 3.27E-18       |
| chlorophyll metabolic process (GO:0015994)                   | 41            | 5.12            | +                 | 8.01                   | 4.25E-18       |
| cellular nitrogen compound biosynthetic process (GO:0044271) | 131           | 52.73           | +                 | 2.48                   | 2.44E-16       |
| organic substance metabolic process (GO:0071704)             | 545           | 395.07          | +                 | 1.38                   | 5.76E-16       |
| plastid organization (GO:0009657)                            | 60            | 13.78           | +                 | 4.36                   | 8.31E-16       |
| small molecule metabolic process (GO:0044281)                | 217           | 115.09          | +                 | 1.89                   | 2.18E-15       |
| tetrapyrrole biosynthetic process (GO:0033014)               | 31            | 3.63            | +                 | 8.55                   | 8.01E-14       |

|                                                                 |     |        |   |       |          |
|-----------------------------------------------------------------|-----|--------|---|-------|----------|
| porphyrin-containing compound biosynthetic process (GO:0006779) | 29  | 3.18   | + | 9.11  | 2.14E-13 |
| photosynthetic electron transport chain (GO:0009767)            | 25  | 2.14   | + | 11.71 | 2.82E-13 |
| response to temperature stimulus (GO:0009266)                   | 94  | 34.89  | + | 2.69  | 5.13E-13 |
| chlorophyll biosynthetic process (GO:0015995)                   | 26  | 2.5    | + | 10.41 | 6.53E-13 |
| protein-containing complex assembly (GO:0065003)                | 79  | 26.83  | + | 2.94  | 1.75E-12 |
| pigment metabolic process (GO:0042440)                          | 44  | 9.55   | + | 4.61  | 8.82E-12 |
| protein-containing complex organization (GO:0043933)            | 81  | 29.81  | + | 2.72  | 5.80E-11 |
| cellular component assembly (GO:0022607)                        | 95  | 39.52  | + | 2.4   | 2.80E-10 |
| photosynthesis, light harvesting (GO:0009765)                   | 20  | 1.73   | + | 11.55 | 4.12E-10 |
| organic cyclic compound biosynthetic process (GO:1901362)       | 91  | 38.15  | + | 2.39  | 1.37E-09 |
| amide biosynthetic process (GO:0043604)                         | 68  | 24.37  | + | 2.79  | 1.99E-09 |
| cellular amide metabolic process (GO:0043603)                   | 77  | 29.53  | + | 2.61  | 2.17E-09 |
| organic cyclic compound metabolic process (GO:1901360)          | 210 | 126.01 | + | 1.67  | 2.27E-09 |
| peptide metabolic process (GO:0006518)                          | 69  | 25.06  | + | 2.75  | 2.34E-09 |
| organonitrogen compound metabolic process (GO:1901564)          | 320 | 218.42 | + | 1.47  | 2.59E-09 |
| pigment biosynthetic process (GO:0046148)                       | 33  | 6.53   | + | 5.06  | 2.86E-09 |
| electron transport chain (GO:0022900)                           | 29  | 5.04   | + | 5.76  | 4.31E-09 |
| translation (GO:0006412)                                        | 62  | 21.67  | + | 2.86  | 8.12E-09 |
| peptide biosynthetic process (GO:0043043)                       | 62  | 21.87  | + | 2.83  | 1.16E-08 |
| chloroplast organization (GO:0009658)                           | 41  | 10.59  | + | 3.87  | 1.20E-08 |
| carboxylic acid metabolic process (GO:0019752)                  | 122 | 61.92  | + | 1.97  | 2.35E-08 |
| cellular aromatic compound metabolic process (GO:0006725)       | 200 | 121.5  | + | 1.65  | 2.40E-08 |
| organic acid metabolic process (GO:0006082)                     | 152 | 84.11  | + | 1.81  | 3.13E-08 |

|                                                                 |     |        |   |       |          |
|-----------------------------------------------------------------|-----|--------|---|-------|----------|
| cellular nitrogen compound metabolic process (GO:0034641)       | 210 | 130.52 | + | 1.61  | 5.21E-08 |
| aromatic compound biosynthetic process (GO:0019438)             | 80  | 33.92  | + | 2.36  | 7.42E-08 |
| oxoacid metabolic process (GO:0043436)                          | 143 | 78.68  | + | 1.82  | 8.54E-08 |
| small molecule biosynthetic process (GO:0044283)                | 83  | 36.18  | + | 2.29  | 9.63E-08 |
| cellular component biogenesis (GO:0044085)                      | 137 | 75.29  | + | 1.82  | 2.61E-07 |
| response to stress (GO:0006950)                                 | 304 | 212.94 | + | 1.43  | 2.74E-07 |
| heterocycle biosynthetic process (GO:0018130)                   | 73  | 30.98  | + | 2.36  | 4.56E-07 |
| heterocycle metabolic process (GO:0046483)                      | 188 | 116.14 | + | 1.62  | 5.37E-07 |
| photosynthesis, light harvesting in photosystem I (GO:0009768)  | 13  | 0.97   | + | 13.45 | 1.88E-06 |
| cellular macromolecule biosynthetic process (GO:0034645)        | 81  | 38.15  | + | 2.12  | 4.89E-06 |
| protein folding (GO:0006457)                                    | 31  | 8.1    | + | 3.83  | 6.26E-06 |
| cellular component organization (GO:0016043)                    | 180 | 114.69 | + | 1.57  | 1.38E-05 |
| response to light intensity (GO:0009642)                        | 43  | 15.03  | + | 2.86  | 1.84E-05 |
| photosynthetic electron transport in photosystem I (GO:0009773) | 11  | 0.77   | + | 14.37 | 2.37E-05 |
| monocarboxylic acid metabolic process (GO:0032787)              | 61  | 26.39  | + | 2.31  | 3.18E-05 |
| response to cold (GO:0009409)                                   | 49  | 19.05  | + | 2.57  | 4.16E-05 |
| nitrogen compound metabolic process (GO:0006807)                | 373 | 286.02 | + | 1.3   | 4.40E-05 |
| cellular component organization or biogenesis (GO:0071840)      | 214 | 145.75 | + | 1.47  | 6.39E-05 |
| cellular lipid metabolic process (GO:0044255)                   | 79  | 39.28  | + | 2.01  | 6.54E-05 |
| photosystem II assembly (GO:0010207)                            | 12  | 1.17   | + | 10.27 | 9.15E-05 |
| response to oxidative stress (GO:0006979)                       | 57  | 24.69  | + | 2.31  | 1.14E-04 |
| lipid metabolic process (GO:0006629)                            | 95  | 51.85  | + | 1.83  | 1.87E-04 |
| thylakoid membrane organization (GO:0010027)                    | 14  | 2.09   | + | 6.68  | 5.67E-04 |

|                                                          |               |                 |                   |                        |                |
|----------------------------------------------------------|---------------|-----------------|-------------------|------------------------|----------------|
| NAD(P)H dehydrogenase complex assembly (GO:0010275)      | 8             | 0.44            | +                 | 18.05                  | 7.79E-04       |
| chloroplast rRNA processing (GO:1901259)                 | 10            | 0.93            | +                 | 10.79                  | 9.14E-04       |
| plastid membrane organization (GO:0009668)               | 14            | 2.42            | +                 | 5.79                   | 2.50E-03       |
| organic acid biosynthetic process (GO:0016053)           | 58            | 28.36           | +                 | 2.05                   | 4.03E-03       |
| energy quenching (GO:1990066)                            | 8             | 0.6             | +                 | 13.24                  | 4.40E-03       |
| nonphotochemical quenching (GO:0010196)                  | 8             | 0.6             | +                 | 13.24                  | 4.40E-03       |
| response to heat (GO:0009408)                            | 32            | 12.05           | +                 | 2.66                   | 6.80E-03       |
| lipid biosynthetic process (GO:0008610)                  | 61            | 30.98           | +                 | 1.97                   | 7.09E-03       |
| plastid translation (GO:0032544)                         | 9             | 0.93            | +                 | 9.71                   | 7.27E-03       |
| chaperone-mediated protein folding (GO:0061077)          | 14            | 2.78            | +                 | 5.04                   | 1.05E-02       |
| response to reactive oxygen species (GO:0000302)         | 22            | 6.65            | +                 | 3.31                   | 1.16E-02       |
| carboxylic acid biosynthetic process (GO:0046394)        | 50            | 24.01           | +                 | 2.08                   | 1.22E-02       |
| gene expression (GO:0010467)                             | 110           | 69.05           | +                 | 1.59                   | 1.25E-02       |
| serine family amino acid metabolic process (GO:0009069)  | 13            | 2.46            | +                 | 5.29                   | 1.46E-02       |
| cellular amino acid metabolic process (GO:0006520)       | 48            | 22.8            | +                 | 2.11                   | 1.87E-02       |
| fat-soluble vitamin metabolic process (GO:0006775)       | 8             | 0.81            | +                 | 9.93                   | 2.35E-02       |
| fat-soluble vitamin biosynthetic process (GO:0042362)    | 8             | 0.81            | +                 | 9.93                   | 2.35E-02       |
| macromolecule biosynthetic process (GO:0009059)          | 86            | 51.77           | +                 | 1.66                   | 3.29E-02       |
| cell cycle (GO:0007049)                                  | 7             | 27.03           | -                 | 0.26                   | 3.46E-02       |
| cellular response to environmental stimulus (GO:0104004) | 27            | 10.19           | +                 | 2.65                   | 4.31E-02       |
| cellular response to abiotic stimulus (GO:0071214)       | 27            | 10.19           | +                 | 2.65                   | 4.31E-02       |
| regulation of photosynthesis (GO:0010109)                | 11            | 1.93            | +                 | 5.69                   | 4.34E-02       |
| <b>Molecular Function</b>                                | <b>Gene #</b> | <b>Expected</b> | <b>Over/Under</b> | <b>Fold enrichment</b> | <b>P-value</b> |

|                                                                                                    |               |                 |                   |                        |                |
|----------------------------------------------------------------------------------------------------|---------------|-----------------|-------------------|------------------------|----------------|
| oxidoreductase activity (GO:0016491)                                                               | 138           | 59.22           | +                 | 2.33                   | 2.37E-15       |
| mRNA binding (GO:0003729)                                                                          | 110           | 42.62           | +                 | 2.58                   | 1.04E-14       |
| binding (GO:0005488)                                                                               | 552           | 415.82          | +                 | 1.33                   | 6.26E-13       |
| RNA binding (GO:0003723)                                                                           | 133           | 65.26           | +                 | 2.04                   | 1.47E-10       |
| catalytic activity (GO:0003824)                                                                    | 456           | 336.29          | +                 | 1.36                   | 1.81E-10       |
| structural constituent of ribosome (GO:0003735)                                                    | 44            | 13.29           | +                 | 3.31                   | 1.19E-07       |
| structural molecule activity (GO:0005198)                                                          | 50            | 19.42           | +                 | 2.58                   | 1.66E-05       |
| heterocyclic compound binding (GO:1901363)                                                         | 281           | 205.85          | +                 | 1.37                   | 8.38E-05       |
| organic cyclic compound binding (GO:0097159)                                                       | 282           | 207.46          | +                 | 1.36                   | 1.14E-04       |
| oxidoreductase activity, acting on the CH-OH group of donors, NAD or NADP as acceptor (GO:0016616) | 25            | 7.25            | +                 | 3.45                   | 7.72E-04       |
| unfolded protein binding (GO:0051082)                                                              | 19            | 4.59            | +                 | 4.14                   | 1.68E-03       |
| chlorophyll binding (GO:0016168)                                                                   | 10            | 1.09            | +                 | 9.19                   | 1.75E-03       |
| oxidoreductase activity, acting on CH-OH group of donors (GO:0016614)                              | 26            | 8.62            | +                 | 3.02                   | 4.45E-03       |
| protein folding chaperone (GO:0044183)                                                             | 14            | 2.74            | +                 | 5.11                   | 5.31E-03       |
| tetrapyrrole binding (GO:0046906)                                                                  | 38            | 16.15           | +                 | 2.35                   | 7.70E-03       |
| isomerase activity (GO:0016853)                                                                    | 28            | 10.11           | +                 | 2.77                   | 8.29E-03       |
| <b>Cellular Component</b>                                                                          | <b>Gene #</b> | <b>Expected</b> | <b>Over/Under</b> | <b>Fold enrichment</b> | <b>P-value</b> |
| chloroplast (GO:0009507)                                                                           | 572           | 204.16          | +                 | 2.8                    | 4.09E-127      |
| plastid (GO:0009536)                                                                               | 593           | 220.92          | +                 | 2.68                   | 9.80E-126      |
| plastid envelope (GO:0009526)                                                                      | 243           | 34.68           | +                 | 7.01                   | 1.31E-113      |
| thylakoid (GO:0009579)                                                                             | 194           | 22.04           | +                 | 8.8                    | 1.29E-103      |
| envelope (GO:0031975)                                                                              | 260           | 51.68           | +                 | 5.03                   | 8.26E-94       |
| organelle envelope (GO:0031967)                                                                    | 260           | 51.68           | +                 | 5.03                   | 8.26E-94       |

|                                                       |     |        |   |       |          |
|-------------------------------------------------------|-----|--------|---|-------|----------|
| plastid stroma (GO:0009532)                           | 206 | 30.25  | + | 6.81  | 5.99E-93 |
| plastid thylakoid (GO:0031976)                        | 168 | 18.17  | + | 9.25  | 1.42E-91 |
| chloroplast thylakoid (GO:0009534)                    | 167 | 17.93  | + | 9.32  | 2.11E-91 |
| chloroplast stroma (GO:0009570)                       | 202 | 29.61  | + | 6.82  | 4.01E-91 |
| photosynthetic membrane (GO:0034357)                  | 146 | 15.55  | + | 9.39  | 1.21E-79 |
| thylakoid membrane (GO:0042651)                       | 145 | 15.35  | + | 9.45  | 2.33E-79 |
| plastid membrane (GO:0042170)                         | 157 | 19.5   | + | 8.05  | 4.59E-78 |
| plastid thylakoid membrane (GO:0055035)               | 137 | 14.22  | + | 9.63  | 1.27E-75 |
| chloroplast thylakoid membrane (GO:0009535)           | 134 | 13.9   | + | 9.64  | 6.55E-74 |
| chloroplast envelope (GO:0009941)                     | 161 | 24.49  | + | 6.57  | 2.06E-69 |
| cytoplasm (GO:0005737)                                | 881 | 597.62 | + | 1.47  | 1.61E-65 |
| organelle subcompartment (GO:0031984)                 | 196 | 44.88  | + | 4.37  | 9.46E-60 |
| organelle membrane (GO:0031090)                       | 201 | 62.52  | + | 3.21  | 1.47E-42 |
| membrane (GO:0016020)                                 | 361 | 202.63 | + | 1.78  | 6.49E-26 |
| cytosol (GO:0005829)                                  | 231 | 106.67 | + | 2.17  | 9.21E-25 |
| intracellular anatomical structure (GO:0005622)       | 993 | 869.09 | + | 1.14  | 2.71E-19 |
| nucleus (GO:0005634)                                  | 284 | 426.97 | - | 0.67  | 4.05E-16 |
| intracellular membrane-bounded organelle (GO:0043231) | 914 | 791.31 | + | 1.16  | 2.54E-14 |
| membrane-bounded organelle (GO:0043227)               | 914 | 793.6  | + | 1.15  | 9.30E-14 |
| thylakoid lumen (GO:0031977)                          | 27  | 2.74   | + | 9.86  | 1.16E-13 |
| intracellular organelle (GO:0043229)                  | 918 | 800.29 | + | 1.15  | 2.52E-13 |
| organelle (GO:0043226)                                | 918 | 802.26 | + | 1.14  | 6.96E-13 |
| chloroplast thylakoid lumen (GO:0009543)              | 23  | 1.97   | + | 11.65 | 1.17E-12 |

|                                                             |      |        |   |       |          |
|-------------------------------------------------------------|------|--------|---|-------|----------|
| plastid thylakoid lumen (GO:0031978)                        | 23   | 2.01   | + | 11.42 | 1.64E-12 |
| photosystem (GO:0009521)                                    | 22   | 2.58   | + | 8.53  | 7.71E-10 |
| cellular anatomical entity (GO:0110165)                     | 1054 | 987.93 | + | 1.07  | 1.70E-09 |
| plastoglobule (GO:0010287)                                  | 19   | 2.42   | + | 7.86  | 8.53E-08 |
| chloroplast thylakoid membrane protein complex (GO:0098807) | 13   | 1.05   | + | 12.41 | 8.96E-07 |
| plastid inner membrane (GO:0009528)                         | 18   | 2.7    | + | 6.67  | 2.38E-06 |
| photosystem II (GO:0009523)                                 | 14   | 1.81   | + | 7.72  | 2.81E-05 |
| chloroplast inner membrane (GO:0009706)                     | 16   | 2.54   | + | 6.3   | 3.42E-05 |
| NAD(P)H dehydrogenase complex (plastoquinone) (GO:0010598)  | 9    | 0.52   | + | 17.19 | 4.10E-05 |
| apoplast (GO:0048046)                                       | 36   | 12.29  | + | 2.93  | 4.13E-05 |
| chloroplast membrane (GO:0031969)                           | 21   | 5.32   | + | 3.95  | 3.46E-04 |
| nucleoid (GO:0009295)                                       | 14   | 2.54   | + | 5.52  | 9.29E-04 |
| photosystem I (GO:0009522)                                  | 9    | 0.89   | + | 10.16 | 1.21E-03 |
| ribosome (GO:0005840)                                       | 39   | 15.99  | + | 2.44  | 1.26E-03 |
| plastid nucleoid (GO:0042646)                               | 13   | 2.26   | + | 5.76  | 1.45E-03 |
| organelle inner membrane (GO:0019866)                       | 34   | 13.05  | + | 2.6   | 1.56E-03 |
| nuclear protein-containing complex (GO:0140513)             | 12   | 36.86  | - | 0.33  | 2.49E-03 |
| membrane protein complex (GO:0098796)                       | 50   | 24.49  | + | 2.04  | 5.38E-03 |
| chloroplast nucleoid (GO:0042644)                           | 11   | 1.97   | + | 5.57  | 1.15E-02 |
| organellar ribosome (GO:0000313)                            | 13   | 3.18   | + | 4.08  | 3.68E-02 |

Supplemental Table 6: Significant, up-regulated GO Terms for artificially acidified sorghum

| <b>Biological Process</b>                                 | <b>Gene #</b> | <b>Expected</b> | <b>Over/Under</b> | <b>Fold Enrichment</b> | <b>P-Value</b> |
|-----------------------------------------------------------|---------------|-----------------|-------------------|------------------------|----------------|
| cellular process (GO:0009987)                             | 387           | 261.52          | +                 | 1.48                   | 1.09E-28       |
| cellular metabolic process (GO:0044237)                   | 273           | 155.47          | +                 | 1.76                   | 5.07E-24       |
| metabolic process (GO:0008152)                            | 303           | 190.63          | +                 | 1.59                   | 5.61E-21       |
| organic substance metabolic process (GO:0071704)          | 280           | 172.69          | +                 | 1.62                   | 2.92E-19       |
| primary metabolic process (GO:0044238)                    | 241           | 144.23          | +                 | 1.67                   | 2.95E-16       |
| cellular biosynthetic process (GO:0044249)                | 116           | 50.57           | +                 | 2.29                   | 1.20E-13       |
| biosynthetic process (GO:0009058)                         | 125           | 58.58           | +                 | 2.13                   | 1.18E-12       |
| organic substance biosynthetic process (GO:1901576)       | 119           | 54.92           | +                 | 2.17                   | 3.46E-12       |
| nitrogen compound metabolic process (GO:0006807)          | 205           | 125.02          | +                 | 1.64                   | 1.64E-11       |
| organonitrogen compound metabolic process (GO:1901564)    | 165           | 95.47           | +                 | 1.73                   | 7.41E-10       |
| organic cyclic compound metabolic process (GO:1901360)    | 109           | 55.08           | +                 | 1.98                   | 2.10E-08       |
| cellular nitrogen compound metabolic process (GO:0034641) | 111           | 57.05           | +                 | 1.95                   | 2.96E-08       |
| response to abiotic stimulus (GO:0009628)                 | 131           | 72.44           | +                 | 1.81                   | 3.27E-08       |
| post-embryonic development (GO:0009791)                   | 84            | 40.16           | +                 | 2.09                   | 8.53E-07       |
| small molecule biosynthetic process (GO:0044283)          | 46            | 15.81           | +                 | 2.91                   | 1.03E-06       |
| cellular aromatic compound metabolic process (GO:0006725) | 101           | 53.11           | +                 | 1.9                    | 1.56E-06       |
| heterocycle metabolic process (GO:0046483)                | 97            | 50.77           | +                 | 1.91                   | 2.97E-06       |
| response to stimulus (GO:0050896)                         | 229           | 163.83          | +                 | 1.4                    | 4.72E-06       |
| macromolecule metabolic process (GO:0043170)              | 164           | 105.44          | +                 | 1.56                   | 5.01E-06       |
| multicellular organism development (GO:0007275)           | 129           | 76.77           | +                 | 1.68                   | 6.33E-06       |
| reproductive structure development (GO:0048608)           | 74            | 35.16           | +                 | 2.1                    | 7.29E-06       |
| reproductive system development (GO:0061458)              | 74            | 35.2            | +                 | 2.1                    | 7.54E-06       |



|                                                              |     |       |   |      |          |
|--------------------------------------------------------------|-----|-------|---|------|----------|
| cellular amide metabolic process (GO:0043603)                | 39  | 12.91 | + | 3.02 | 9.09E-06 |
| developmental process involved in reproduction (GO:0003006)  | 80  | 39.81 | + | 2.01 | 1.19E-05 |
| fruit development (GO:0010154)                               | 56  | 23.56 | + | 2.38 | 1.54E-05 |
| response to stress (GO:0006950)                              | 146 | 93.08 | + | 1.57 | 3.26E-05 |
| cellular nitrogen compound biosynthetic process (GO:0044271) | 54  | 23.05 | + | 2.34 | 7.05E-05 |
| multicellular organismal process (GO:0032501)                | 132 | 82.3  | + | 1.6  | 7.42E-05 |
| reproduction (GO:0000003)                                    | 86  | 46.61 | + | 1.85 | 1.37E-04 |
| generation of precursor metabolites and energy (GO:0006091)  | 26  | 7.17  | + | 3.63 | 1.51E-04 |
| small molecule metabolic process (GO:0044281)                | 91  | 50.31 | + | 1.81 | 1.60E-04 |
| reproductive process (GO:0022414)                            | 85  | 46.15 | + | 1.84 | 1.85E-04 |
| seed development (GO:0048316)                                | 52  | 22.66 | + | 2.29 | 1.98E-04 |
| phosphorus metabolic process (GO:0006793)                    | 68  | 33.88 | + | 2.01 | 2.66E-04 |
| organonitrogen compound biosynthetic process (GO:1901566)    | 55  | 25.2  | + | 2.18 | 3.39E-04 |
| plastid organization (GO:0009657)                            | 23  | 6.02  | + | 3.82 | 3.81E-04 |
| phosphate-containing compound metabolic process (GO:0006796) | 66  | 33.09 | + | 1.99 | 5.31E-04 |
| carboxylic acid metabolic process (GO:0019752)               | 57  | 27.06 | + | 2.11 | 8.04E-04 |
| protein metabolic process (GO:0019538)                       | 109 | 66.91 | + | 1.63 | 8.87E-04 |
| embryo development (GO:0009790)                              | 36  | 13.68 | + | 2.63 | 9.79E-04 |
| tRNA aminoacylation for protein translation (GO:0006418)     | 10  | 1.06  | + | 9.47 | 1.05E-03 |
| lipid metabolic process (GO:0006629)                         | 50  | 22.66 | + | 2.21 | 1.26E-03 |
| tRNA aminoacylation (GO:0043039)                             | 10  | 1.09  | + | 9.16 | 1.38E-03 |
| amino acid activation (GO:0043038)                           | 10  | 1.09  | + | 9.16 | 1.38E-03 |
| peptide metabolic process (GO:0006518)                       | 31  | 10.95 | + | 2.83 | 1.53E-03 |

|                                                               |     |        |   |       |          |
|---------------------------------------------------------------|-----|--------|---|-------|----------|
| embryo development ending in seed dormancy (GO:0009793)       | 33  | 12.2   | + | 2.7   | 1.73E-03 |
| response to chemical (GO:0042221)                             | 134 | 88.98  | + | 1.51  | 1.94E-03 |
| oxylipin biosynthetic process (GO:0031408)                    | 7   | 0.4    | + | 17.28 | 1.96E-03 |
| organic cyclic compound biosynthetic process (GO:1901362)     | 40  | 16.68  | + | 2.4   | 2.16E-03 |
| amide biosynthetic process (GO:0043604)                       | 30  | 10.65  | + | 2.82  | 2.59E-03 |
| oxylipin metabolic process (GO:0031407)                       | 7   | 0.44   | + | 15.9  | 3.15E-03 |
| nucleobase-containing compound metabolic process (GO:0006139) | 73  | 40.04  | + | 1.82  | 3.67E-03 |
| oxoacid metabolic process (GO:0043436)                        | 65  | 34.39  | + | 1.89  | 3.84E-03 |
| jasmonic acid biosynthetic process (GO:0009695)               | 7   | 0.46   | + | 15.29 | 3.94E-03 |
| anatomical structure development (GO:0048856)                 | 138 | 93.5   | + | 1.48  | 4.14E-03 |
| monocarboxylic acid metabolic process (GO:0032787)            | 31  | 11.53  | + | 2.69  | 4.32E-03 |
| gene expression (GO:0010467)                                  | 59  | 30.18  | + | 1.95  | 5.36E-03 |
| developmental process (GO:0032502)                            | 147 | 101.97 | + | 1.44  | 6.67E-03 |
| photosynthesis (GO:0015979)                                   | 16  | 3.7    | + | 4.33  | 7.14E-03 |
| tRNA metabolic process (GO:0006399)                           | 15  | 3.35   | + | 4.48  | 9.82E-03 |
| response to heat (GO:0009408)                                 | 19  | 5.26   | + | 3.61  | 1.04E-02 |
| response to osmotic stress (GO:0006970)                       | 37  | 15.74  | + | 2.35  | 1.23E-02 |
| carboxylic acid biosynthetic process (GO:0046394)             | 28  | 10.49  | + | 2.67  | 1.60E-02 |
| monocarboxylic acid biosynthetic process (GO:0072330)         | 17  | 4.44   | + | 3.83  | 1.61E-02 |
| response to temperature stimulus (GO:0009266)                 | 36  | 15.25  | + | 2.36  | 1.67E-02 |
| system development (GO:0048731)                               | 101 | 64.45  | + | 1.57  | 1.77E-02 |
| organic acid metabolic process (GO:0006082)                   | 66  | 36.77  | + | 1.8   | 1.87E-02 |
| jasmonic acid metabolic process (GO:0009694)                  | 8   | 0.88   | + | 9.09  | 2.08E-02 |

|                                                                                                 |               |                 |                   |                        |                |
|-------------------------------------------------------------------------------------------------|---------------|-----------------|-------------------|------------------------|----------------|
| translation (GO:0006412)                                                                        | 26            | 9.47            | +                 | 2.74                   | 2.16E-02       |
| organic acid biosynthetic process (GO:0016053)                                                  | 31            | 12.4            | +                 | 2.5                    | 2.45E-02       |
| peptide biosynthetic process (GO:0043043)                                                       | 26            | 9.56            | +                 | 2.72                   | 2.52E-02       |
| response to salt stress (GO:0009651)                                                            | 28            | 10.95           | +                 | 2.56                   | 3.40E-02       |
| cellular component organization (GO:0016043)                                                    | 82            | 50.13           | +                 | 1.64                   | 3.70E-02       |
| lipid biosynthetic process (GO:0008610)                                                         | 32            | 13.54           | +                 | 2.36                   | 3.92E-02       |
| response to oxygen-containing compound (GO:1901700)                                             | 87            | 54.36           | +                 | 1.6                    | 3.95E-02       |
| RNA metabolic process (GO:0016070)                                                              | 48            | 24.46           | +                 | 1.96                   | 4.67E-02       |
| <b>Molecular Function</b>                                                                       | <b>Gene #</b> | <b>Expected</b> | <b>Over/Under</b> | <b>Fold Enrichment</b> | <b>P-Value</b> |
| catalytic activity (GO:0003824)                                                                 | 271           | 147             | +                 | 1.84                   | 1.70E-27       |
| binding (GO:0005488)                                                                            | 296           | 181.75          | +                 | 1.63                   | 4.26E-22       |
| mRNA binding (GO:0003729)                                                                       | 59            | 18.63           | +                 | 3.17                   | 5.00E-11       |
| protein binding (GO:0005515)                                                                    | 172           | 100.81          | +                 | 1.71                   | 2.52E-10       |
| RNA binding (GO:0003723)                                                                        | 74            | 28.53           | +                 | 2.59                   | 4.34E-10       |
| ATP-dependent activity (GO:0140657)                                                             | 43            | 12.82           | +                 | 3.35                   | 3.57E-08       |
| organic cyclic compound binding (GO:0097159)                                                    | 153           | 90.68           | +                 | 1.69                   | 4.07E-08       |
| heterocyclic compound binding (GO:1901363)                                                      | 151           | 89.98           | +                 | 1.68                   | 8.09E-08       |
| ribonucleoside triphosphate phosphatase activity (GO:0017111)                                   | 33            | 8.36            | +                 | 3.95                   | 1.80E-07       |
| pyrophosphatase activity (GO:0016462)                                                           | 35            | 9.47            | +                 | 3.69                   | 2.58E-07       |
| hydrolase activity, acting on acid anhydrides, in phosphorus-containing anhydrides (GO:0016818) | 35            | 9.63            | +                 | 3.63                   | 3.92E-07       |
| hydrolase activity, acting on acid anhydrides (GO:0016817)                                      | 35            | 9.7             | +                 | 3.61                   | 4.70E-07       |
| hydrolase activity (GO:0016787)                                                                 | 90            | 47.44           | +                 | 1.9                    | 1.02E-05       |
| small molecule binding (GO:0036094)                                                             | 56            | 23.86           | +                 | 2.35                   | 1.97E-05       |

|                                                                              |               |                 |                   |                        |                |
|------------------------------------------------------------------------------|---------------|-----------------|-------------------|------------------------|----------------|
| ligase activity (GO:0016874)                                                 | 19            | 4               | +                 | 4.75                   | 1.23E-04       |
| translation factor activity, RNA binding (GO:0008135)                        | 13            | 1.83            | +                 | 7.1                    | 2.30E-04       |
| ATP hydrolysis activity (GO:0016887)                                         | 20            | 4.67            | +                 | 4.29                   | 2.68E-04       |
| translation regulator activity, nucleic acid binding (GO:0090079)            | 13            | 1.87            | +                 | 6.96                   | 2.81E-04       |
| ligase activity, forming carbon-oxygen bonds (GO:0016875)                    | 10            | 1.06            | +                 | 9.47                   | 6.17E-04       |
| aminoacyl-tRNA ligase activity (GO:0004812)                                  | 10            | 1.06            | +                 | 9.47                   | 6.17E-04       |
| transferase activity (GO:0016740)                                            | 101           | 61.45           | +                 | 1.64                   | 1.17E-03       |
| catalytic activity, acting on a tRNA (GO:0140101)                            | 14            | 2.52            | +                 | 5.56                   | 1.18E-03       |
| ion binding (GO:0043167)                                                     | 85            | 49.37           | +                 | 1.72                   | 2.00E-03       |
| oxidoreductase activity (GO:0016491)                                         | 53            | 25.88           | +                 | 2.05                   | 2.50E-03       |
| catalytic activity, acting on RNA (GO:0140098)                               | 27            | 9.26            | +                 | 2.92                   | 2.91E-03       |
| translation elongation factor activity (GO:0003746)                          | 6             | 0.3             | +                 | 20.04                  | 3.67E-03       |
| translation regulator activity (GO:0045182)                                  | 13            | 2.39            | +                 | 5.43                   | 3.76E-03       |
| anion binding (GO:0043168)                                                   | 48            | 22.52           | +                 | 2.13                   | 3.94E-03       |
| metallopeptidase activity (GO:0008237)                                       | 11            | 1.69            | +                 | 6.51                   | 4.64E-03       |
| protein folding chaperone (GO:0044183)                                       | 9             | 1.2             | +                 | 7.52                   | 1.32E-02       |
| nucleotide binding (GO:0000166)                                              | 42            | 19.86           | +                 | 2.11                   | 1.65E-02       |
| nucleoside phosphate binding (GO:1901265)                                    | 42            | 19.86           | +                 | 2.11                   | 1.65E-02       |
| ATP-dependent protein folding chaperone (GO:0140662)                         | 8             | 0.95            | +                 | 8.41                   | 2.03E-02       |
| transferase activity, transferring phosphorus-containing groups (GO:0016772) | 51            | 26.54           | +                 | 1.92                   | 2.37E-02       |
| catalytic activity, acting on a protein (GO:0140096)                         | 76            | 45.85           | +                 | 1.66                   | 2.90E-02       |
| <b>Cellular Component</b>                                                    | <b>Gene #</b> | <b>Expected</b> | <b>Over/Under</b> | <b>Fold Enrichment</b> | <b>P-Value</b> |
| plastid (GO:0009536)                                                         | 212           | 96.56           | +                 | 2.2                    | 4.82E-29       |

|                                                       |     |        |   |      |          |
|-------------------------------------------------------|-----|--------|---|------|----------|
| chloroplast stroma (GO:0009570)                       | 73  | 12.94  | + | 5.64 | 1.50E-28 |
| plastid stroma (GO:0009532)                           | 73  | 13.22  | + | 5.52 | 5.28E-28 |
| chloroplast (GO:0009507)                              | 198 | 89.24  | + | 2.22 | 5.05E-27 |
| cytoplasm (GO:0005737)                                | 370 | 261.22 | + | 1.42 | 2.77E-21 |
| cytosol (GO:0005829)                                  | 114 | 46.63  | + | 2.44 | 5.60E-16 |
| plastid envelope (GO:0009526)                         | 57  | 15.16  | + | 3.76 | 5.09E-14 |
| chloroplast envelope (GO:0009941)                     | 45  | 10.71  | + | 4.2  | 2.78E-12 |
| intracellular anatomical structure (GO:0005622)       | 442 | 379.88 | + | 1.16 | 3.90E-11 |
| membrane (GO:0016020)                                 | 157 | 88.57  | + | 1.77 | 1.25E-10 |
| envelope (GO:0031975)                                 | 64  | 22.59  | + | 2.83 | 1.74E-10 |
| organelle envelope (GO:0031967)                       | 64  | 22.59  | + | 2.83 | 1.74E-10 |
| intracellular membrane-bounded organelle (GO:0043231) | 414 | 345.88 | + | 1.2  | 3.58E-10 |
| membrane-bounded organelle (GO:0043227)               | 414 | 346.89 | + | 1.19 | 6.86E-10 |
| thylakoid (GO:0009579)                                | 38  | 9.63   | + | 3.95 | 2.51E-09 |
| intracellular organelle (GO:0043229)                  | 414 | 349.81 | + | 1.18 | 4.70E-09 |
| organelle (GO:0043226)                                | 414 | 350.67 | + | 1.18 | 8.85E-09 |
| cellular anatomical entity (GO:0110165)               | 470 | 431.83 | + | 1.09 | 6.43E-08 |
| plasma membrane (GO:0005886)                          | 101 | 54.18  | + | 1.86 | 8.35E-07 |
| chloroplast thylakoid (GO:0009534)                    | 30  | 7.84   | + | 3.83 | 9.68E-07 |
| plastid thylakoid (GO:0031976)                        | 30  | 7.94   | + | 3.78 | 1.30E-06 |
| plasmodesma (GO:0009506)                              | 43  | 15.64  | + | 2.75 | 4.43E-06 |
| cell-cell junction (GO:0005911)                       | 43  | 15.64  | + | 2.75 | 4.43E-06 |
| symplast (GO:0055044)                                 | 43  | 15.64  | + | 2.75 | 4.43E-06 |

|                                             |     |       |   |      |          |
|---------------------------------------------|-----|-------|---|------|----------|
| anchoring junction (GO:0070161)             | 43  | 15.64 | + | 2.75 | 4.43E-06 |
| cell junction (GO:0030054)                  | 43  | 15.64 | + | 2.75 | 4.43E-06 |
| cell periphery (GO:0071944)                 | 110 | 63.06 | + | 1.74 | 5.90E-06 |
| apoplast (GO:0048046)                       | 23  | 5.37  | + | 4.28 | 1.22E-05 |
| organelle subcompartment (GO:0031984)       | 46  | 19.62 | + | 2.35 | 1.38E-04 |
| vacuole (GO:0005773)                        | 44  | 18.52 | + | 2.38 | 2.12E-04 |
| plastid membrane (GO:0042170)               | 27  | 8.52  | + | 3.17 | 2.44E-04 |
| thylakoid membrane (GO:0042651)             | 22  | 6.71  | + | 3.28 | 1.76E-03 |
| photosynthetic membrane (GO:0034357)        | 22  | 6.8   | + | 3.24 | 2.14E-03 |
| protein-containing complex (GO:0032991)     | 88  | 54.48 | + | 1.62 | 6.21E-03 |
| plant-type vacuole (GO:0000325)             | 33  | 14.03 | + | 2.35 | 6.99E-03 |
| cytoplasmic vesicle (GO:0031410)            | 31  | 12.94 | + | 2.4  | 9.77E-03 |
| intracellular vesicle (GO:0097708)          | 31  | 12.98 | + | 2.39 | 1.02E-02 |
| nucleolus (GO:0005730)                      | 24  | 8.84  | + | 2.72 | 1.29E-02 |
| chloroplast thylakoid membrane (GO:0009535) | 19  | 6.07  | + | 3.13 | 1.57E-02 |
| plastid thylakoid membrane (GO:0055035)     | 19  | 6.22  | + | 3.06 | 2.11E-02 |
| Golgi apparatus (GO:0005794)                | 41  | 20.76 | + | 1.97 | 4.43E-02 |

Supplemental Table 7: Significant, down-regulated GO Terms for severe-cold-challenged sorghum

| <b>Biological Process</b>                                                                                                         | <b>Gene #</b> | <b>Expected</b> | <b>Over/Under</b> | <b>Fold Enrichment</b> | <b>P-Value</b> |
|-----------------------------------------------------------------------------------------------------------------------------------|---------------|-----------------|-------------------|------------------------|----------------|
| response to light intensity (GO:0009642)                                                                                          | 17            | 3.94            | +                 | 4.31                   | 2.76E-03       |
| electron transport chain (GO:0022900)                                                                                             | 10            | 1.32            | +                 | 7.57                   | 5.13E-03       |
| regulation of shoot system development (GO:0048831)                                                                               | 11            | 2.03            | +                 | 5.42                   | 3.23E-02       |
| generation of precursor metabolites and energy (GO:0006091)                                                                       | 16            | 4.3             | +                 | 3.72                   | 3.49E-02       |
| <b>Molecular Function</b>                                                                                                         | <b>Gene #</b> | <b>Expected</b> | <b>Over/Under</b> | <b>Fold Enrichment</b> | <b>P-Value</b> |
| protein binding (GO:0005515)                                                                                                      | 94            | 60.53           | +                 | 1.55                   | 1.05E-02       |
| electron transporter, transferring electrons within the cyclic electron transport pathway of photosynthesis activity (GO:0045156) | 4             | 0.12            | +                 | 34.39                  | 2.62E-02       |
| <b>Cellular Component</b>                                                                                                         | <b>Gene #</b> | <b>Expected</b> | <b>Over/Under</b> | <b>Fold Enrichment</b> | <b>P-Value</b> |
| <b>mitochondrial respirasome (GO:0005746)</b>                                                                                     | 13            | 1.22            | +                 | 10.69                  | 6.83E-07       |
| <b>respiratory chain complex (GO:0098803)</b>                                                                                     | 13            | 1.26            | +                 | 10.33                  | 1.00E-06       |
| <b>respirasome (GO:0070469)</b>                                                                                                   | 13            | 1.32            | +                 | 9.84                   | 1.73E-06       |
| <b>inner mitochondrial membrane protein complex (GO:0098800)</b>                                                                  | 15            | 1.98            | +                 | 7.59                   | 2.79E-06       |
| <b>oxidoreductase complex (GO:1990204)</b>                                                                                        | 14            | 1.72            | +                 | 8.12                   | 4.12E-06       |
| <b>mitochondrial envelope (GO:0005740)</b>                                                                                        | 19            | 3.57            | +                 | 5.32                   | 6.04E-06       |
| <b>envelope (GO:0031975)</b>                                                                                                      | 38            | 13.56           | +                 | 2.8                    | 1.20E-05       |
| <b>organelle envelope (GO:0031967)</b>                                                                                            | 38            | 13.56           | +                 | 2.8                    | 1.20E-05       |
| <b>mitochondrial inner membrane (GO:0005743)</b>                                                                                  | 16            | 2.7             | +                 | 5.93                   | 2.21E-05       |
| <b>transmembrane transporter complex (GO:1902495)</b>                                                                             | 11            | 1.09            | +                 | 10.1                   | 2.31E-05       |
| <b>transporter complex (GO:1990351)</b>                                                                                           | 11            | 1.13            | +                 | 9.72                   | 3.31E-05       |
| <b>mitochondrial protein-containing complex (GO:0098798)</b>                                                                      | 16            | 2.83            | +                 | 5.65                   | 4.23E-05       |
| <b>membrane protein complex (GO:0098796)</b>                                                                                      | 24            | 6.43            | +                 | 3.73                   | 4.57E-05       |
| <b>mitochondrial membrane (GO:0031966)</b>                                                                                        | 17            | 3.39            | +                 | 5.01                   | 8.38E-05       |

|                                                               |    |       |   |       |          |
|---------------------------------------------------------------|----|-------|---|-------|----------|
| <b>integral component of membrane (GO:0016021)</b>            | 22 | 5.7   | + | 3.86  | 9.48E-05 |
| <b>membrane (GO:0016020)</b>                                  | 90 | 53.18 | + | 1.69  | 1.72E-04 |
| <b>cytosol (GO:0005829)</b>                                   | 57 | 28    | + | 2.04  | 1.78E-04 |
| <b>cytochrome complex (GO:0070069)</b>                        | 7  | 0.4   | + | 17.42 | 2.83E-04 |
| <b>organelle inner membrane (GO:0019866)</b>                  | 16 | 3.43  | + | 4.67  | 4.80E-04 |
| <b>organelle membrane (GO:0031090)</b>                        | 39 | 16.41 | + | 2.38  | 5.05E-04 |
| <b>intrinsic component of membrane (GO:0031224)</b>           | 27 | 9.12  | + | 2.96  | 5.94E-04 |
| <b>thylakoid membrane (GO:0042651)</b>                        | 16 | 4.03  | + | 3.97  | 3.54E-03 |
| <b>photosynthetic membrane (GO:0034357)</b>                   | 16 | 4.08  | + | 3.92  | 4.15E-03 |
| <b>chloroplast thylakoid membrane (GO:0009535)</b>            | 15 | 3.65  | + | 4.11  | 4.71E-03 |
| <b>chloroplast thylakoid (GO:0009534)</b>                     | 17 | 4.7   | + | 3.61  | 5.96E-03 |
| <b>plastid thylakoid membrane (GO:0055035)</b>                | 15 | 3.73  | + | 4.02  | 6.12E-03 |
| <b>thylakoid (GO:0009579)</b>                                 | 19 | 5.78  | + | 3.29  | 6.51E-03 |
| <b>plastid thylakoid (GO:0031976)</b>                         | 17 | 4.77  | + | 3.57  | 7.05E-03 |
| <b>mitochondrial respiratory chain complex I (GO:0005747)</b> | 7  | 0.77  | + | 9.07  | 1.45E-02 |
| <b>respiratory chain complex I (GO:0045271)</b>               | 7  | 0.8   | + | 8.71  | 1.84E-02 |
| <b>NADH dehydrogenase complex (GO:0030964)</b>                | 7  | 0.85  | + | 8.28  | 2.50E-02 |

Supplemental Table 8: Significant, up-regulated GO Terms for severe-cold-challenged sorghum
